# Supplementary material for: Deep-ultraviolet sulfamate halides with halogen-centered secondary building units for enhanced optical anisotropy
Source: Royal Society of Chemistry journal article supplement (doi:10.1039/d4qi03302g), 2025-01-01
Supplement: d4qi03302g1.pdf [file d4qi03302g1.pdf]

## Electronic Supplementary Information (ESI) for:

### Deep-ultraviolet sulfamate halides with halogen-centered secondary building units for enhanced optical anisotropy

Xuefei Wang, Qingwen Zhu, Yunseung Kuk, Hongheng Chen, Qi Wu,\* Qun Jing\* and Kang Min Ok\*

#### Table of contents

|                                                                                                                                                                                                                                                                                                                                                                                                        |           |
|--------------------------------------------------------------------------------------------------------------------------------------------------------------------------------------------------------------------------------------------------------------------------------------------------------------------------------------------------------------------------------------------------------|-----------|
| <b>Table S1.</b> Crystallographic data of $\text{MX}(\text{NH}_3\text{SO}_3)$ ( $\text{M} = \text{Rb}, \text{Cs}; \text{X} = \text{Cl}, \text{Br}$ ). .....                                                                                                                                                                                                                                            | <b>2</b>  |
| <b>Table S2.</b> Fractional atomic coordinates ( $\times 10^4$ ), equivalent isotropic displacement parameters ( $\text{\AA}^2 \times 10^3$ ) and bond valence sum (BVS) for the non-H atoms in $\text{MX}(\text{NH}_3\text{SO}_3)$ ( $\text{M} = \text{Rb}, \text{Cs}; \text{X} = \text{Cl}, \text{Br}$ ). $U_{\text{eq}}$ is defined as 1/3 of the trace of the orthogonalized $U_{ij}$ tensor. .... | <b>3</b>  |
| <b>Table S3.</b> Selected bond lengths ( $\text{\AA}$ ) and angles ( $^\circ$ ) for $\text{RbCl}(\text{NH}_3\text{SO}_3)$ . ....                                                                                                                                                                                                                                                                       | <b>4</b>  |
| <b>Table S4.</b> Selected bond lengths ( $\text{\AA}$ ) and angles ( $^\circ$ ) for $\text{CsCl}(\text{NH}_3\text{SO}_3)$ . ....                                                                                                                                                                                                                                                                       | <b>5</b>  |
| <b>Table S5.</b> Selected bond lengths ( $\text{\AA}$ ) and angles ( $^\circ$ ) for $\text{RbBr}(\text{NH}_3\text{SO}_3)$ . ....                                                                                                                                                                                                                                                                       | <b>6</b>  |
| <b>Table S6.</b> Selected bond lengths ( $\text{\AA}$ ) and angles ( $^\circ$ ) for $\text{CsBr}(\text{NH}_3\text{SO}_3)$ . ....                                                                                                                                                                                                                                                                       | <b>7</b>  |
| <b>Table S7.</b> Hydrogen bonds for $\text{RbCl}(\text{NH}_3\text{SO}_3)$ . ....                                                                                                                                                                                                                                                                                                                       | <b>8</b>  |
| <b>Table S8.</b> Hydrogen bonds for $\text{CsCl}(\text{NH}_3\text{SO}_3)$ . ....                                                                                                                                                                                                                                                                                                                       | <b>8</b>  |
| <b>Table S9.</b> Hydrogen bonds for $\text{RbBr}(\text{NH}_3\text{SO}_3)$ . ....                                                                                                                                                                                                                                                                                                                       | <b>8</b>  |
| <b>Table S10.</b> Hydrogen bonds for $\text{CsBr}(\text{NH}_3\text{SO}_3)$ . ....                                                                                                                                                                                                                                                                                                                      | <b>8</b>  |
| <b>Table S11.</b> Weight and atomic ratios for $\text{MX}(\text{NH}_3\text{SO}_3)$ ( $\text{M} = \text{Rb}, \text{Cs}; \text{X} = \text{Cl}, \text{Br}$ ) obtained from SEM-EDX. ....                                                                                                                                                                                                                  | <b>9</b>  |
| <b>Table S12.</b> Calculated and experimental residual weight for $\text{MX}(\text{NH}_3\text{SO}_3)$ ( $\text{M} = \text{Rb}, \text{Cs}; \text{X} = \text{Cl}, \text{Br}$ ) at 800 $^\circ\text{C}$ in TGA. ....                                                                                                                                                                                      | <b>9</b>  |
| <b>Table S13.</b> Assigned vibration peaks for $\text{MX}(\text{NH}_3\text{SO}_3)$ ( $\text{M} = \text{Rb}, \text{Cs}; \text{X} = \text{Cl}, \text{Br}$ ). ....                                                                                                                                                                                                                                        | <b>9</b>  |
| <b>Table S14.</b> Comparison of the non- $\pi$ -conjugated optical materials derivatives in the short-wave UV region. ....                                                                                                                                                                                                                                                                             | <b>10</b> |
| <b>Figure S1.</b> Experimental and simulated PXRD patterns for $\text{MX}(\text{NH}_3\text{SO}_3)$ ( $\text{M} = \text{Rb}, \text{Cs}; \text{X} = \text{Cl}, \text{Br}$ ). ....                                                                                                                                                                                                                        | <b>12</b> |
| <b>Figure S2.</b> SEM-EDX for $\text{MX}(\text{NH}_3\text{SO}_3)$ ( $\text{M} = \text{Rb}, \text{Cs}; \text{X} = \text{Cl}, \text{Br}$ ). ....                                                                                                                                                                                                                                                         | <b>13</b> |
| <b>Figure S3.</b> (a) The asymmetric unit and (b) pseudo-doubled layer along the $ab$ planes for $\text{RbCl}(\text{NH}_3\text{SO}_3)$ . ....                                                                                                                                                                                                                                                          | <b>14</b> |
| <b>Figure S4.</b> (a) The asymmetric unit for $\text{CsCl}(\text{NH}_3\text{SO}_3)$ and (b) the asymmetric unit for $\text{RbBr}(\text{NH}_3\text{SO}_3)$ . ....                                                                                                                                                                                                                                       | <b>14</b> |
| <b>Figure S5.</b> The intersection angle of the $(\text{NH}_3\text{SO}_3)$ tetrahedra in (a) $\text{RbBr}(\text{NH}_3\text{SO}_3)$ and (b) $\text{CsBr}(\text{NH}_3\text{SO}_3)$ . ....                                                                                                                                                                                                                | <b>14</b> |
| <b>Figure S6.</b> TGA diagrams for $\text{MX}(\text{NH}_3\text{SO}_3)$ ( $\text{M} = \text{Rb}, \text{Cs}; \text{X} = \text{Cl}, \text{Br}$ ). ....                                                                                                                                                                                                                                                    | <b>15</b> |
| <b>Figure S7.</b> IR spectra for $\text{MX}(\text{NH}_3\text{SO}_3)$ ( $\text{M} = \text{Rb}, \text{Cs}; \text{X} = \text{Cl}, \text{Br}$ ). ....                                                                                                                                                                                                                                                      | <b>15</b> |
| <b>Figure S8.</b> Band structures of compounds for $\text{MX}(\text{NH}_3\text{SO}_3)$ ( $\text{M} = \text{Rb}, \text{Cs}; \text{X} = \text{Cl}, \text{Br}$ ). ....                                                                                                                                                                                                                                    | <b>16</b> |
| <b>References</b> .....                                                                                                                                                                                                                                                                                                                                                                                | <b>17</b> |

**Table S1.** Crystallographic data of MX(NH<sub>3</sub>SO<sub>3</sub>) (M = Rb, Cs; X = Cl, Br)

|                                                                                                | <b>RbCl(NH<sub>3</sub>SO<sub>3</sub>)</b>                     | <b>CsCl(NH<sub>3</sub>SO<sub>3</sub>)</b>                       | <b>RbBr(NH<sub>3</sub>SO<sub>3</sub>)</b>                       | <b>CsBr(NH<sub>3</sub>SO<sub>3</sub>)</b>                       |
|------------------------------------------------------------------------------------------------|---------------------------------------------------------------|-----------------------------------------------------------------|-----------------------------------------------------------------|-----------------------------------------------------------------|
| Formula weight                                                                                 | 218.01                                                        | 265.45                                                          | 262.47                                                          | 309.90                                                          |
| Temp/K                                                                                         | 300.0                                                         | 299.0                                                           | 299.0                                                           | 300.0                                                           |
| Crystal system                                                                                 | monoclinic                                                    | monoclinic                                                      | orthorhombic                                                    | orthorhombic                                                    |
| Space group                                                                                    | <i>P2<sub>1</sub>/m</i>                                       | <i>P2<sub>1</sub>/m</i>                                         | <i>Pnma</i>                                                     | <i>Pnma</i>                                                     |
| <i>a</i> /Å                                                                                    | 4.7178(5)                                                     | 7.100(2)                                                        | 13.292(3)                                                       | 13.9270(9)                                                      |
| <i>b</i> /Å                                                                                    | 6.1824(6)                                                     | 5.5448(17)                                                      | 5.7921(9)                                                       | 5.7869(4)                                                       |
| <i>c</i> /Å                                                                                    | 9.8402(10)                                                    | 7.915(3)                                                        | 7.6673(18)                                                      | 7.9082(5)                                                       |
| <i>α</i> /°                                                                                    | 90                                                            | 90                                                              | 90                                                              | 90                                                              |
| <i>β</i> /°                                                                                    | 91.718(3)                                                     | 102.466(10)                                                     | 90                                                              | 90                                                              |
| <i>γ</i> /°                                                                                    | 90                                                            | 90                                                              | 90                                                              | 90                                                              |
| <i>V</i> /Å <sup>3</sup>                                                                       | 286.88(5)                                                     | 304.25(17)                                                      | 590.3(2)                                                        | 637.35(7)                                                       |
| <i>Z</i>                                                                                       | 2                                                             | 2                                                               | 4                                                               | 4                                                               |
| $\rho_{\text{calc}}$ g/cm <sup>3</sup>                                                         | 2.524                                                         | 2.898                                                           | 2.953                                                           | 3.230                                                           |
| $\mu$ /mm <sup>-1</sup>                                                                        | 9.362                                                         | 6.777                                                           | 15.417                                                          | 12.320                                                          |
| <i>F</i> (000)                                                                                 | 208.0                                                         | 244.0                                                           | 488.0                                                           | 559.1                                                           |
| Crystal size/mm <sup>3</sup>                                                                   | 0.259 × 0.143 ×<br>0.108                                      | 0.252 × 0.111 ×<br>0.093                                        | 0.140 × 0.115 ×<br>0.096                                        | 0.189 × 0.124 ×<br>0.102                                        |
| 2 theta range/°                                                                                | 7.786 to 60.93                                                | 5.27 to 60.946                                                  | 6.13 to 60.964                                                  | 5.86 to 60.98                                                   |
| Index ranges                                                                                   | -6 ≤ <i>h</i> ≤ 6<br>-8 ≤ <i>k</i> ≤ 8<br>-14 ≤ <i>l</i> ≤ 14 | -10 ≤ <i>h</i> ≤ 10<br>-7 ≤ <i>k</i> ≤ 7<br>-11 ≤ <i>l</i> ≤ 11 | -18 ≤ <i>h</i> ≤ 18<br>-7 ≤ <i>k</i> ≤ 4<br>-10 ≤ <i>l</i> ≤ 10 | -19 ≤ <i>h</i> ≤ 16<br>-8 ≤ <i>k</i> ≤ 8<br>-11 ≤ <i>l</i> ≤ 11 |
| Reflns collected                                                                               | 5991                                                          | 7769                                                            | 5974                                                            | 10301                                                           |
| Independent reflns                                                                             | 936<br>( <i>R</i> <sub>int</sub> = 0.0382)                    | 1010<br>( <i>R</i> <sub>int</sub> = 0.0374)                     | 934<br>( <i>R</i> <sub>int</sub> = 0.0538)                      | 1049<br>( <i>R</i> <sub>int</sub> = 0.0781)                     |
| Data/restraints/param                                                                          | 936/2/47                                                      | 1010/2/45                                                       | 934/2/48                                                        | 1049/2/47                                                       |
| Goof on <i>F</i> <sup>2</sup>                                                                  | 1.106                                                         | 1.253                                                           | 1.053                                                           | 1.228                                                           |
| <i>R</i> <sub>1</sub> <sup>a</sup> / <i>wR</i> <sub>2</sub> <sup>b</sup> [I ≥ 2σ ( <i>I</i> )] | 0.0201/0.0401                                                 | 0.0198/0.0384                                                   | 0.0323/0.0768                                                   | 0.0491/0.0847                                                   |
| <i>R</i> <sub>1</sub> <sup>a</sup> / <i>wR</i> <sub>2</sub> <sup>b</sup> [all data]            | 0.0250/0.0410                                                 | 0.0234/0.0520                                                   | 0.0543/0.0823                                                   | 0.0589/0.0875                                                   |
| Largest diff peak/hole / e Å <sup>-3</sup>                                                     | 0.44/-0.50                                                    | 0.63/-0.73                                                      | 0.77/-0.78                                                      | 1.33/-1.90                                                      |

$$^a R_1 = \sum ||F_o| - |F_c|| / \sum |F_o|. \quad ^b wR_2 = [\sum w(F_o^2 - F_c^2)^2 / \sum wF_o^4]^{1/2}$$

**Table S2.** Fractional atomic coordinates ( $\times 10^4$ ), equivalent isotropic displacement parameters ( $\text{\AA}^2 \times 10^3$ ) and bond valence sum (BVS) for the non-H atoms in  $\text{MX}(\text{NH}_3\text{SO}_3)$  (M = Rb, Cs; X = Cl, Br).  $U_{\text{eq}}$  is defined as 1/3 of the trace of the orthogonalized  $U_{ij}$  tensor.

| Atom                                      | x          | y       | z          | $U(\text{eq})$ | BVS  |
|-------------------------------------------|------------|---------|------------|----------------|------|
| <b>RbCl(NH<sub>3</sub>SO<sub>3</sub>)</b> |            |         |            |                |      |
| Rb1                                       | 3030.4(5)  | 2500    | 8283.0(3)  | 26.2(1)        | 0.99 |
| Cl1                                       | 7879.7(14) | 2500    | 5742.7(6)  | 26.50(15)      | 0.24 |
| S1                                        | 8797.5(12) | 7500    | 8155.7(6)  | 18.04(13)      | 5.89 |
| O1                                        | 7792(3)    | 5541(2) | 8756.6(13) | 27.6(3)        | 1.96 |
| O2                                        | 11760(4)   | 7500    | 7850.5(19) | 30.1(4)        | 1.81 |
| N1                                        | 7173(5)    | 7500    | 6523(2)    | 21.6(4)        | 0.90 |
| <b>CsCl(NH<sub>3</sub>SO<sub>3</sub>)</b> |            |         |            |                |      |
| Cs1                                       | 6170.5(4)  | 12500   | 8266.3(4)  | 24.94(9)       | 1.09 |
| Cl1                                       | 1333.4(17) | 2500    | 9124.5(16) | 28.0(2)        | 0.40 |
| S1                                        | 2645.6(16) | 7500    | 6173.5(14) | 20.1(2)        | 5.88 |
| O1                                        | 4134(5)    | 7500    | 7719(4)    | 26.6(7)        | 2.09 |
| O2                                        | 2478(4)    | 5311(5) | 5184(3)    | 31.7(5)        | 1.80 |
| N1                                        | 547(6)     | 7500    | 7037(5)    | 24.3(8)        | 0.88 |
| <b>RbBr(NH<sub>3</sub>SO<sub>3</sub>)</b> |            |         |            |                |      |
| Rb1                                       | 4236.7(5)  | 2500    | 1122.2(8)  | 30.5(2)        | 0.79 |
| Br1                                       | 1978.9(5)  | 2500    | 3992.3(8)  | 26.1(2)        | 0.43 |
| S1                                        | 3617.0(11) | 7500    | 4357.0(18) | 19.8(3)        | 5.79 |
| O1                                        | 2867(3)    | 7500    | 3009(6)    | 27.5(10)       | 1.66 |
| O2                                        | 3692(2)    | 5409(5) | 5369(4)    | 28.5(7)        | 1.64 |
| N1                                        | 4750(4)    | 7500    | 3125(7)    | 22.2(10)       | 1.22 |
| <b>CsBr(NH<sub>3</sub>SO<sub>3</sub>)</b> |            |         |            |                |      |
| Cs1                                       | 1965.5(4)  | 2500    | 4013.3(6)  | 22.59(18)      | 1.08 |
| Br1                                       | 4241.8(7)  | 2500    | 1121.9(10) | 26.6(2)        | 0.37 |
| S1                                        | 3696.4(14) | 7500    | 4377(2)    | 17.7(4)        | 5.91 |
| O1                                        | 3790(3)    | 5407(7) | 5344(5)    | 27.0(9)        | 1.85 |
| O2                                        | 2936(4)    | 7500    | 3139(7)    | 27.9(13)       | 1.94 |
| N1                                        | 4729(5)    | 7500    | 3090(8)    | 19.8(13)       | 0.97 |

**Table S3.** Selected bond lengths (Å) and angles (°) for RbCl(NH<sub>3</sub>SO<sub>3</sub>).

|                                       |            |                                       |            |
|---------------------------------------|------------|---------------------------------------|------------|
| Rb1-Cl1                               | 3.4388(7)  | O1 <sup>6</sup> -Rb1-O1 <sup>3</sup>  | 162.18(5)  |
| Rb1-Cl1 <sup>3</sup>                  | 3.4336(7)  | O1 <sup>6</sup> -Rb1-O1 <sup>4</sup>  | 74.16(4)   |
| Rb1-O1 <sup>4</sup>                   | 3.1891(14) | O1 <sup>5</sup> -Rb1-O1 <sup>4</sup>  | 61.38(4)   |
| Rb1-O1 <sup>3</sup>                   | 3.1513(14) | O1 <sup>6</sup> -Rb1-O1 <sup>5</sup>  | 101.12(4)  |
| Rb1-O1 <sup>5</sup>                   | 3.1513(14) | O1-Rb1-O1 <sup>2</sup>                | 74.16(4)   |
| Rb1-O1 <sup>6</sup>                   | 2.9556(13) | O1 <sup>2</sup> -Rb1-O1 <sup>4</sup>  | 44.63(5)   |
| Rb1-O1 <sup>2</sup>                   | 3.1891(14) | O1 <sup>3</sup> -Rb1-O1 <sup>4</sup>  | 88.52(2)   |
| Rb1-O1                                | 2.9556(13) | O1 <sup>5</sup> -Rb1-O1 <sup>3</sup>  | 73.27(5)   |
| Rb1-O2 <sup>3</sup>                   | 3.1750(5)  | O1 <sup>6</sup> -Rb1-O1               | 79.02(5)   |
| Rb1-O2 <sup>1</sup>                   | 3.1750(5)  | O1 <sup>5</sup> -Rb1-O2 <sup>1</sup>  | 45.02(4)   |
| S1-O1                                 | 1.4345(13) | O1 <sup>3</sup> -Rb1-O2 <sup>3</sup>  | 45.02(4)   |
| S1-O1 <sup>7</sup>                    | 1.4345(13) | O1-Rb1-O2 <sup>1</sup>                | 141.27(4)  |
| S1-O2                                 | 1.4383(19) | O1 <sup>6</sup> -Rb1-O2 <sup>3</sup>  | 141.27(4)  |
| S1-N1                                 | 1.759(2)   | O1 <sup>3</sup> -Rb1-O2 <sup>1</sup>  | 117.07(4)  |
| Cl1 <sup>3</sup> -Rb1-Cl1             | 86.705(17) | O1-Rb1-O2 <sup>3</sup>                | 62.69(4)   |
| O1 <sup>5</sup> -Rb1-Cl1              | 130.49(2)  | O1 <sup>5</sup> -Rb1-O2 <sup>3</sup>  | 117.07(4)  |
| O1-Rb1-Cl1                            | 66.15(3)   | O1 <sup>6</sup> -Rb1-O2 <sup>1</sup>  | 62.69(4)   |
| O1 <sup>4</sup> -Rb1-Cl1 <sup>3</sup> | 124.21(3)  | O2 <sup>1</sup> -Rb1-Cl1 <sup>3</sup> | 77.04(3)   |
| O1 <sup>6</sup> -Rb1-Cl1 <sup>3</sup> | 129.25(3)  | O2 <sup>3</sup> -Rb1-Cl1 <sup>3</sup> | 77.04(3)   |
| O1 <sup>4</sup> -Rb1-Cl1              | 139.98(3)  | O2 <sup>3</sup> -Rb1-Cl1              | 91.70(4)   |
| O1 <sup>3</sup> -Rb1-Cl1 <sup>3</sup> | 64.31(2)   | O2 <sup>1</sup> -Rb1-Cl1              | 91.70(4)   |
| O1-Rb1-Cl1 <sup>3</sup>               | 129.25(3)  | O2 <sup>1</sup> -Rb1-O1 <sup>4</sup>  | 74.05(4)   |
| O1 <sup>2</sup> -Rb1-Cl1 <sup>3</sup> | 124.21(3)  | O2 <sup>3</sup> -Rb1-O1 <sup>2</sup>  | 74.05(4)   |
| O1 <sup>2</sup> -Rb1-Cl1              | 139.98(3)  | O2 <sup>3</sup> -Rb1-O1 <sup>4</sup>  | 117.68(4)  |
| O1 <sup>6</sup> -Rb1-Cl1              | 66.15(3)   | O2 <sup>1</sup> -Rb1-O1 <sup>2</sup>  | 117.68(4)  |
| O1 <sup>5</sup> -Rb1-Cl1 <sup>3</sup> | 64.31(2)   | O2 <sup>3</sup> -Rb1-O2 <sup>1</sup>  | 153.61(6)  |
| O1 <sup>3</sup> -Rb1-Cl1              | 130.49(2)  | O1 <sup>8</sup> -S1-O1                | 115.15(12) |
| O1-Rb1-O1 <sup>5</sup>                | 162.18(5)  | O1 <sup>8</sup> -S1-O2                | 114.94(7)  |
| O1 <sup>6</sup> -Rb1-O1 <sup>2</sup>  | 102.13(3)  | O1-S1-O2                              | 114.94(7)  |
| O1 <sup>3</sup> -Rb1-O1 <sup>2</sup>  | 61.38(4)   | O1-S1-N1                              | 103.65(7)  |
| O1-Rb1-O1 <sup>4</sup>                | 102.13(3)  | O1 <sup>8</sup> -S1-N1                | 103.65(7)  |
| O1-Rb1-O1 <sup>3</sup>                | 101.12(4)  | O2-S1-N1                              | 102.05(11) |
| O1 <sup>5</sup> -Rb1-O1 <sup>2</sup>  | 88.52(2)   |                                       |            |

<sup>1</sup>-1+x, -1+y, +z; <sup>2</sup>1-x, 1-y, 2-z; <sup>3</sup>-1+x, +y, +z; <sup>4</sup>1-x, -1/2+y, 2-z; <sup>5</sup>-1+x, 1/2-y, +z; <sup>6</sup>+x, 1/2-y, +z; <sup>7</sup>+x, 3/2-y, +z; <sup>8</sup>+x, 3/2-y, +z

**Table S4.** Selected bond lengths (Å) and angles (°) for CsCl(NH<sub>3</sub>SO<sub>3</sub>).

|                                        |            |                                       |            |
|----------------------------------------|------------|---------------------------------------|------------|
| Cs1-O2 <sup>1</sup>                    | 3.314(3)   | O2 <sup>6</sup> -Cs1-O2 <sup>5</sup>  | 84.04(5)   |
| Cs1-Cl1 <sup>2</sup>                   | 3.6759(11) | O2 <sup>1</sup> -Cs1-O2 <sup>7</sup>  | 84.04(5)   |
| Cs1-Cl1 <sup>3</sup>                   | 3.5808(17) | O2 <sup>1</sup> -Cs1-O2 <sup>5</sup>  | 64.73(7)   |
| Cs1-Cl1 <sup>4</sup>                   | 3.6759(11) | O2 <sup>7</sup> -Cs1-O2 <sup>7</sup>  | 64.73(7)   |
| Cs1-Cl1 <sup>5</sup>                   | 3.6418(16) | O2 <sup>6</sup> -Cs1-O2 <sup>1</sup>  | 42.96(9)   |
| Cs1-O2 <sup>5</sup>                    | 3.534(3)   | O1 <sup>4</sup> -Cs1-Cl1 <sup>4</sup> | 64.78(4)   |
| Cs1-O2 <sup>6</sup>                    | 3.314(3)   | O1 <sup>4</sup> -Cs1-Cl1 <sup>2</sup> | 64.78(4)   |
| Cs1-O2 <sup>7</sup>                    | 3.534(3)   | O1 <sup>5</sup> -Cs1-Cl1 <sup>2</sup> | 154.54(7)  |
| Cs1-O1                                 | 3.1135(17) | O1 <sup>4</sup> -Cs1-Cl1 <sup>3</sup> | 95.54(6)   |
| Cs1-O1 <sup>5</sup>                    | 3.1135(17) | O1 <sup>4</sup> -Cs1-Cl1 <sup>5</sup> | 63.29(6)   |
| Cs1-O1 <sup>4</sup>                    | 3.232(4)   | O1 <sup>5</sup> -Cs1-Cl1 <sup>5</sup> | 66.28(6)   |
| S1-O2 <sup>7</sup>                     | 1.435(2)   | O1-Cs1-Cl1 <sup>3</sup>               | 116.87(6)  |
| S1-O2                                  | 1.435(2)   | O1 <sup>5</sup> -Cs1-Cl1 <sup>3</sup> | 116.87(6)  |
| S1-O1                                  | 1.433(3)   | O1 <sup>5</sup> -Cs1-Cl1 <sup>4</sup> | 63.88(6)   |
| S1-N1                                  | 1.768(4)   | O1-Cs1-Cl1 <sup>4</sup>               | 154.54(7)  |
| Cl1 <sup>5</sup> -Cs1-Cl1 <sup>4</sup> | 104.77(2)  | O1-Cs1-Cl1 <sup>2</sup>               | 63.88(6)   |
| Cl1 <sup>4</sup> -Cs1-Cl1 <sup>2</sup> | 104.77(2)  | O1-Cs1-Cl1 <sup>5</sup>               | 66.28(6)   |
| Cl1 <sup>3</sup> -Cs1-Cl1 <sup>2</sup> | 62.86(2)   | O1 <sup>5</sup> -Cs1-O2 <sup>6</sup>  | 114.81(8)  |
| Cl1 <sup>4</sup> -Cs1-Cl1 <sup>2</sup> | 97.91(4)   | O1 <sup>5</sup> -Cs1-O2 <sup>7</sup>  | 92.50(7)   |
| Cl1 <sup>3</sup> -Cs1-Cl1 <sup>5</sup> | 158.83(4)  | O1-Cs1-O2 <sup>7</sup>                | 42.12(7)   |
| Cl1 <sup>3</sup> -Cs1-Cl1 <sup>4</sup> | 62.86(2)   | O1 <sup>5</sup> -Cs1-O2 <sup>5</sup>  | 42.12(7)   |
| O2 <sup>5</sup> -Cs1-Cl1 <sup>4</sup>  | 104.54(5)  | O1-Cs1-O2 <sup>1</sup>                | 114.81(8)  |
| O2 <sup>7</sup> -Cs1-Cl1 <sup>2</sup>  | 104.54(5)  | O1 <sup>5</sup> -Cs1-O2 <sup>1</sup>  | 76.55(8)   |
| O2 <sup>6</sup> -Cs1-Cl1 <sup>5</sup>  | 127.31(5)  | O1-Cs1-O2 <sup>6</sup>                | 76.55(8)   |
| O2 <sup>6</sup> -Cs1-Cl1 <sup>3</sup>  | 71.93(5)   | O1 <sup>4</sup> -Cs1-O2 <sup>7</sup>  | 118.80(7)  |
| O2 <sup>5</sup> -Cs1-Cl1 <sup>2</sup>  | 156.38(4)  | O1 <sup>4</sup> -Cs1-O2 <sup>5</sup>  | 118.80(7)  |
| O2 <sup>7</sup> -Cs1-Cl1 <sup>5</sup>  | 62.61(5)   | O1 <sup>4</sup> -Cs1-O2 <sup>1</sup>  | 154.57(5)  |
| O2 <sup>7</sup> -Cs1-Cl1 <sup>3</sup>  | 135.01(5)  | O1-Cs1-O2 <sup>5</sup>                | 92.50(7)   |
| O2 <sup>1</sup> -Cs1-Cl1 <sup>5</sup>  | 127.31(5)  | O1 <sup>4</sup> -Cs1-O2 <sup>6</sup>  | 154.57(5)  |
| O2 <sup>5</sup> -Cs1-Cl1 <sup>5</sup>  | 62.61(5)   | O1-Cs1-O1 <sup>5</sup>                | 125.86(11) |
| O2 <sup>7</sup> -Cs1-Cl1 <sup>4</sup>  | 156.38(4)  | O1 <sup>5</sup> -Cs1-O1 <sup>4</sup>  | 90.53(7)   |
| O2 <sup>6</sup> -Cs1-Cl1 <sup>4</sup>  | 123.30(5)  | O1-Cs1-O1 <sup>4</sup>                | 90.53(7)   |
| O2 <sup>1</sup> -Cs1-Cl1 <sup>4</sup>  | 89.81(5)   | O2-S1-O2 <sup>7</sup>                 | 115.5(2)   |
| O2 <sup>6</sup> -Cs1-Cl1 <sup>2</sup>  | 89.81(5)   | O2 <sup>7</sup> -S1-N1                | 103.50(13) |
| O2 <sup>1</sup> -Cs1-Cl1 <sup>3</sup>  | 71.93(5)   | O2-S1-N1                              | 103.50(13) |
| O2 <sup>5</sup> -Cs1-Cl1 <sup>3</sup>  | 135.01(5)  | O1-S1-O2                              | 115.12(12) |
| O2 <sup>1</sup> -Cs1-Cl1 <sup>2</sup>  | 123.30(5)  | O1-S1-O2 <sup>7</sup>                 | 115.12(13) |
| O2 <sup>7</sup> -Cs1-O2 <sup>5</sup>   | 52.34(8)   | O1-S1-N1                              | 101.4(2)   |

<sup>1</sup>1-x, 2-y, 1-z; <sup>2</sup>1-x, 1-y, 2-z; <sup>3</sup>1+x, 1+y, +z; <sup>4</sup>1-x, 2-y, 2-z; <sup>5</sup>+x, 1+y, +z; <sup>6</sup>1-x, 1/2+y, 1-z; <sup>7</sup>+x, 3/2-y, +z; <sup>8</sup>+x, -1+y, +z; <sup>9</sup>-1+x, -1+y, +z

**Table S5.** Selected bond lengths (Å) and angles (°) for RbBr(NH<sub>3</sub>SO<sub>3</sub>).

|                                        |             |                                        |            |
|----------------------------------------|-------------|----------------------------------------|------------|
| Br1-Rb1 <sup>1</sup>                   | 3.6460(13)  | N1-Rb1-Br1 <sup>7</sup>                | 78.90(10)  |
| Br1-Rb1 <sup>2</sup>                   | 3.6965(7)   | N1-Rb1-Br1 <sup>8</sup>                | 67.29(8)   |
| Br1-Rb1 <sup>3</sup>                   | 3.6965(7)   | N1 <sup>11</sup> -Rb1-Br1 <sup>7</sup> | 78.89(10)  |
| Br1-Rb1                                | 3.7213(11)  | N1 <sup>10</sup> -Rb1-Br1 <sup>7</sup> | 66.15(9)   |
| Rb1-N1 <sup>5</sup>                    | 3.348(3)    | N1 <sup>11</sup> -Rb1-Br1              | 83.86(9)   |
| Rb1-N1                                 | 3.348(3)    | N1-Rb1-Br1                             | 83.86(9)   |
| Rb1-N1 <sup>4</sup>                    | 3.524(5)    | N1 <sup>11</sup> -Rb1-Br1 <sup>9</sup> | 67.29(8)   |
| S1-O1                                  | 1.436(4)    | N1 <sup>11</sup> -Rb1-Br1 <sup>8</sup> | 165.77(10) |
| S1-O2                                  | 1.442(3)    | N1 <sup>10</sup> -Rb1-Br1 <sup>9</sup> | 76.05(6)   |
| S1-O2 <sup>6</sup>                     | 1.442(3)    | N1 <sup>10</sup> -Rb1-Br1              | 148.73(9)  |
| S1-N1                                  | 1.778(6)    | N1-Rb1-N1 <sup>11</sup>                | 119.76(16) |
| Br1 <sup>7</sup> -Rb1-Br1 <sup>8</sup> | 115.235(16) | N1 <sup>11</sup> -Rb1-N1 <sup>10</sup> | 110.24(9)  |
| Br1 <sup>7</sup> -Rb1-Br1 <sup>9</sup> | 115.235(16) | N1-Rb1-N1 <sup>10</sup>                | 110.24(9)  |
| Br1 <sup>8</sup> -Rb1-Br1              | 84.765(17)  | O1-S1-O2 <sup>12</sup>                 | 115.82(15) |
| Br1 <sup>7</sup> -Rb1-Br1              | 145.13(2)   | O1-S1-O2                               | 115.82(15) |
| Br1 <sup>8</sup> -Rb1-Br1 <sup>9</sup> | 103.15(3)   | O1-S1-N1                               | 101.9(3)   |
| Br1 <sup>9</sup> -Rb1-Br1              | 84.765(17)  | O2-S1-O2 <sup>12</sup>                 | 114.3(3)   |
| N1-Rb1-Br1 <sup>9</sup>                | 165.77(10)  | O2-S1-N1                               | 103.13(16) |
| N1 <sup>10</sup> -Rb1-Br1 <sup>8</sup> | 76.05(6)    | O2 <sup>12</sup> -S1-N1                | 103.13(16) |

<sup>1</sup>-1/2+x, +y, 1/2-z; <sup>2</sup>1/2-x, 1-y, 1/2+z; <sup>3</sup>1/2-x, 1-y, 1/2+z; <sup>4</sup>1-x, 1-y, -z; <sup>5</sup>+x, -1+y, +z; <sup>6</sup>+x, 3/2-y, +z; <sup>7</sup>1/2+x, +y, 1/2-z; <sup>8</sup>1/2-x, 1-y, -1/2+z; <sup>9</sup>1/2-x, -y, -1/2+z; <sup>10</sup>1-x, 1-y, -z; <sup>11</sup>+x, -1+y, +z; <sup>12</sup>+x, 3/2-y, +z

**Table S6.** Selected bond lengths (Å) and angles (°) for CsBr(NH<sub>3</sub>SO<sub>3</sub>).

|                                        |            |                                        |            |
|----------------------------------------|------------|----------------------------------------|------------|
| Cs1-Br1 <sup>1</sup>                   | 3.7390(7)  | O1-Cs1-O1 <sup>13</sup>                | 136.59(11) |
| Cs1-Br1 <sup>2</sup>                   | 3.7390(7)  | O1-Cs1-O1 <sup>11</sup>                | 110.20(8)  |
| Cs1-S1 <sup>3</sup>                    | 3.7809(18) | O1 <sup>12</sup> -Cs1-O2               | 101.83(12) |
| Cs1-S1 <sup>4</sup>                    | 3.7769(13) | O1 <sup>12</sup> -Cs1-O2 <sup>10</sup> | 44.03(12)  |
| Cs1-S1                                 | 3.7770(13) | O1-Cs1-O2                              | 44.03(12)  |
| Cs1-O1 <sup>5</sup>                    | 3.316(4)   | O1 <sup>12</sup> -Cs1-O2 <sup>8</sup>  | 68.95(11)  |
| Cs1-O1                                 | 3.224(4)   | O1-Cs1-O2 <sup>10</sup>                | 101.83(12) |
| Cs1-O1 <sup>6</sup>                    | 3.224(4)   | O1-Cs1-O2 <sup>8</sup>                 | 68.95(11)  |
| Cs1-O1 <sup>3</sup>                    | 3.316(4)   | O2-Cs1-Br1 <sup>8</sup>                | 66.11(9)   |
| Cs1-O2 <sup>2</sup>                    | 3.266(6)   | O2 <sup>8</sup> -Cs1-Br1 <sup>8</sup>  | 64.74(5)   |
| Cs1-O2                                 | 3.268(3)   | O2 <sup>10</sup> -Cs1-Br1 <sup>9</sup> | 66.11(9)   |
| Cs1-O2 <sup>4</sup>                    | 3.268(3)   | O2-Cs1-Br1 <sup>9</sup>                | 164.93(10) |
| S1-O1                                  | 1.439(4)   | O2 <sup>8</sup> -Cs1-Br1 <sup>9</sup>  | 64.74(5)   |
| S1-O1 <sup>7</sup>                     | 1.439(4)   | O2-Cs1-O1 <sup>11</sup>                | 67.84(13)  |
| S1-O2                                  | 1.442(6)   | O2 <sup>10</sup> -Cs1-O1 <sup>13</sup> | 67.84(13)  |
| S1-N1                                  | 1.761(7)   | O2 <sup>10</sup> -Cs1-O1 <sup>11</sup> | 105.65(12) |
| Br1 <sup>8</sup> -Cs1-Br1 <sup>9</sup> | 101.40(2)  | O2 <sup>8</sup> -Cs1-O1 <sup>11</sup>  | 152.58(10) |
| O1 <sup>12</sup> -Cs1-Br1 <sup>9</sup> | 78.76(8)   | O2-Cs1-O1 <sup>13</sup>                | 105.65(12) |
| O1-Cs1-Br1 <sup>8</sup>                | 78.76(8)   | O2 <sup>8</sup> -Cs1-O1 <sup>13</sup>  | 152.58(10) |
| O1 <sup>11</sup> -Cs1-Br1 <sup>8</sup> | 87.99(7)   | O2 <sup>10</sup> -Cs1-O2               | 124.63(18) |
| O1 <sup>13</sup> -Cs1-Br1 <sup>8</sup> | 122.02(8)  | O2 <sup>8</sup> -Cs1-O2 <sup>11</sup>  | 101.18(10) |
| O1 <sup>12</sup> -Cs1-Br1 <sup>8</sup> | 127.78(7)  | O2 <sup>8</sup> -Cs1-O2                | 101.18(10) |
| O1 <sup>13</sup> -Cs1-Br1 <sup>9</sup> | 87.99(7)   | O1 <sup>14</sup> -S1-O1                | 114.7(4)   |
| O1-Cs1-Br1 <sup>9</sup>                | 127.78(7)  | O1-S1-O2                               | 115.3(2)   |
| O1 <sup>11</sup> -Cs1-Br1 <sup>9</sup> | 122.02(8)  | O1 <sup>14</sup> -S1-O2                | 115.3(2)   |
| O1 <sup>13</sup> -Cs1-O1 <sup>11</sup> | 42.85(14)  | O1 <sup>14</sup> -S1-N1                | 103.5(2)   |
| O1 <sup>12</sup> -Cs1-O1 <sup>13</sup> | 110.20(8)  | O1-S1-N1                               | 103.5(2)   |
| O1-Cs1-O1 <sup>12</sup>                | 62.90(14)  | O2-S1-N1                               | 102.0(3)   |
| O1 <sup>12</sup> -Cs1-O1 <sup>11</sup> | 136.59(11) |                                        |            |

<sup>1</sup>1/2-x, -y, 1/2+z; <sup>2</sup>1/2-x, 1-y, 1/2+z; <sup>3</sup>1/2-x, 1-y, -1/2+z; <sup>4</sup>+x, -1+y, +z; <sup>5</sup>1/2-x, -1/2+y, -1/2+z; <sup>6</sup>+x, 1/2-y, +z;  
<sup>7</sup>+x, 3/2-y, +z; <sup>8</sup>1/2-x, 1-y, 1/2+z; <sup>9</sup>1/2-x, -y, 1/2+z; <sup>10</sup>+x, -1+y, +z; <sup>11</sup>1/2-x, 1-y, -1/2+z; <sup>12</sup>+x, 1/2-y, +z;  
<sup>13</sup>1/2-x, -1/2+y, -1/2+z; <sup>14</sup>+x, 3/2-y, +z

**Table S7.** Hydrogen bonds for RbCl(NH<sub>3</sub>SO<sub>3</sub>).

| D-H...A                 | <i>d</i> <sub>D-H</sub> (Å) | <i>d</i> <sub>H-A</sub> (Å) | <i>d</i> <sub>D-A</sub> (Å) |
|-------------------------|-----------------------------|-----------------------------|-----------------------------|
| N1-H1A-Cl1 <sup>1</sup> | 0.848(15)                   | 2.420(16)                   | 3.2049(7)                   |
| N1-H1B-Cl1 <sup>2</sup> | 0.842(18)                   | 2.72(3)                     | 3.214(2)                    |
| N1-H1B-O2 <sup>3</sup>  | 0.842(18)                   | 2.15(2)                     | 2.903(3)                    |

<sup>1</sup>+x, 1+y, +z; <sup>2</sup>1-x, 1-y, 1-z; <sup>3</sup>-1+x, +y, +z

**Table S8.** Hydrogen bonds for CsCl(NH<sub>3</sub>SO<sub>3</sub>).

| D-H...A                 | <i>d</i> <sub>D-H</sub> (Å) | <i>d</i> <sub>H-A</sub> (Å) | <i>d</i> <sub>D-A</sub> (Å) |
|-------------------------|-----------------------------|-----------------------------|-----------------------------|
| N1-H1A-Cl1 <sup>1</sup> | 0.826(18)                   | 2.42(2)                     | 3.214(2)                    |
| N1-H1B-O2 <sup>2</sup>  | 0.871(19)                   | 2.234(16)                   | 2.916(4)                    |
| N1-H1B-O2 <sup>3</sup>  | 0.871(19)                   | 2.234(16)                   | 2.916(4)                    |

<sup>1</sup>+x, 1+y, +z; <sup>2</sup>-x, 1-y, 1-z; <sup>3</sup>-x, 1/2+y, 1-z

**Table S9.** Hydrogen bonds for RbBr(NH<sub>3</sub>SO<sub>3</sub>).

| D-H...A                 | <i>d</i> <sub>D-H</sub> (Å) | <i>d</i> <sub>H-A</sub> (Å) | <i>d</i> <sub>D-A</sub> (Å) |
|-------------------------|-----------------------------|-----------------------------|-----------------------------|
| N1-H1A-O2 <sup>1</sup>  | 0.84(2)                     | 2.289(18)                   | 2.908(5)                    |
| N1-H1B-Br1 <sup>2</sup> | 0.870(18)                   | 3.57(4)                     | 3.914(6)                    |

<sup>1</sup>1-x, 1-y, 1-z; <sup>2</sup>1/2-x, 1-y, -1/2+z

**Table S10.** Hydrogen bonds for CsBr(NH<sub>3</sub>SO<sub>3</sub>).

| D-H...A                 | <i>d</i> <sub>D-H</sub> (Å) | <i>d</i> <sub>H-A</sub> (Å) | <i>d</i> <sub>D-A</sub> (Å) |
|-------------------------|-----------------------------|-----------------------------|-----------------------------|
| N1-H1A-Br1 <sup>1</sup> | 0.853(19)                   | 2.55(3)                     | 3.355(3)                    |
| N1-H1B-O1 <sup>2</sup>  | 0.84(2)                     | 2.299(18)                   | 2.936(7)                    |
| N1-H1B-O1 <sup>3</sup>  | 0.84(2)                     | 2.299(18)                   | 2.936(7)                    |

<sup>1</sup>+x, 1+y, +z; <sup>2</sup>1-x, 1-y, 1-z; <sup>3</sup>1-x, 1/2+y, 1-z



**Table S11.** Weight and atomic ratios for  $\text{MX}(\text{NH}_3\text{SO}_3)$  (M = Rb, Cs; X = Cl, Br) obtained from SEM-EDX.

| Element      | $\text{RbCl}(\text{NH}_3\text{SO}_3)$ |          | $\text{CsCl}(\text{NH}_3\text{SO}_3)$ |          | $\text{RbBr}(\text{NH}_3\text{SO}_3)$ |          | $\text{CsBr}(\text{NH}_3\text{SO}_3)$ |          |
|--------------|---------------------------------------|----------|---------------------------------------|----------|---------------------------------------|----------|---------------------------------------|----------|
|              | Wt %                                  | Atomic % |
| Rb           | 38.24                                 | 12.79    | /                                     | /        | 28.81                                 | 11.47    | /                                     | /        |
| Cs           | /                                     | /        | 39.30                                 | 8.43     | /                                     | /        | 37.41                                 | 9.87     |
| Cl           | 15.23                                 | 12.28    | 10.93                                 | 8.79     | /                                     | /        | /                                     | /        |
| Br           | /                                     | /        | /                                     | /        | 30.92                                 | 13.16    | 22.56                                 | 9.90     |
| O            | 25.79                                 | 46.07    | 29.17                                 | 52.02    | 20.84                                 | 44.32    | 22.46                                 | 49.24    |
| S            | 11.73                                 | 10.46    | 9.76                                  | 8.69     | 11.80                                 | 12.52    | 9.24                                  | 10.11    |
| N            | 9.01                                  | 18.40    | 10.84                                 | 22.07    | 7.63                                  | 18.53    | 8.33                                  | 20.87    |
| <b>Total</b> | 100                                   |          | 100                                   |          | 100                                   |          | 100                                   |          |

**Table S12.** Calculated and experimental residual weight for  $\text{MX}(\text{NH}_3\text{SO}_3)$  (M = Rb, Cs; X = Cl, Br) at 800 °C in TGA.

| Compound                              | Cal. (%) | Exp. (%) |
|---------------------------------------|----------|----------|
| $\text{RbCl}(\text{NH}_3\text{SO}_3)$ | 61.24    | 68.41    |
| $\text{CsCl}(\text{NH}_3\text{SO}_3)$ | 68.30    | 73.01    |
| $\text{RbBr}(\text{NH}_3\text{SO}_3)$ | 50.86    | 58.12    |
| $\text{CsBr}(\text{NH}_3\text{SO}_3)$ | 58.41    | 61.97    |

**Table S13.** Assigned vibration peaks for  $\text{MX}(\text{NH}_3\text{SO}_3)$  (M = Rb, Cs; X = Cl, Br).

| Functional group | Vibration type       | $\text{RbCl}(\text{NH}_3\text{SO}_3)$ | $\text{CsCl}(\text{NH}_3\text{SO}_3)$ | $\text{RbBr}(\text{NH}_3\text{SO}_3)$ | $\text{CsBr}(\text{NH}_3\text{SO}_3)$ |
|------------------|----------------------|---------------------------------------|---------------------------------------|---------------------------------------|---------------------------------------|
|                  |                      | Wavenumber ( $\text{cm}^{-1}$ )       |                                       |                                       |                                       |
| NH <sub>3</sub>  | stretching           | 3166                                  | 3161                                  | 3202                                  | 3207                                  |
| NH <sub>3</sub>  | Wagging              | 2436                                  | 2432                                  |                                       |                                       |
| NH <sub>3</sub>  | bending              | 1425                                  | 1424                                  | 1410                                  | 1414                                  |
| SO <sub>3</sub>  | Antisymmetric and    | 1265                                  | 1273                                  | 1260                                  | 1249                                  |
|                  |                      | 1060                                  | 1063                                  | 1067                                  | 1061                                  |
|                  | symmetric stretching | 978                                   | 987                                   | 990                                   | 1002                                  |
|                  |                      | 691                                   | 704                                   | 694                                   | 680                                   |

**Table S14.** Comparison of the non- $\pi$ -conjugated optical materials derivatives in the short-wave UV region.

|                   | <b>Compound</b>                                                                                  | <b>Space group</b>                              | <b>Cut-off edge (nm)</b> | <b>Birefringence</b>          |           |
|-------------------|--------------------------------------------------------------------------------------------------|-------------------------------------------------|--------------------------|-------------------------------|-----------|
| 1                 | RbCl(NH <sub>3</sub> SO <sub>3</sub> )                                                           | <i>P2<sub>1</sub>/m</i>                         | 185                      | 0.069 @ 546 nm <sup>a</sup>   | This work |
| 2                 | CsCl(NH <sub>3</sub> SO <sub>3</sub> )                                                           | <i>P2<sub>1</sub>/m</i>                         | 185                      | 0.073 @ 546 nm <sup>a</sup>   | This work |
| 3                 | RbBr(NH <sub>3</sub> SO <sub>3</sub> )                                                           | <i>Pnma</i>                                     | 193                      | 0.072 @ 546 nm <sup>a</sup>   | This work |
| 4                 | CsBr(NH <sub>3</sub> SO <sub>3</sub> )                                                           | <i>Pnma</i>                                     | 195                      | 0.075 @ 546 nm <sup>a</sup>   | This work |
| <b>Phosphates</b> |                                                                                                  |                                                 |                          |                               |           |
| 5                 | NaBaAl(PO <sub>4</sub> ) <sub>2</sub>                                                            | <i>P2<sub>1</sub>/c</i>                         | <190                     | 0.005 @ 589 nm <sup>a</sup>   | [1]       |
| 6                 | Na <sub>2</sub> Ca <sub>17</sub> Al <sub>2</sub> (PO <sub>4</sub> ) <sub>14</sub>                | <i>R3c</i>                                      | 179                      | 0.012 @ 1064 nm <sup>b</sup>  | [2]       |
| 7                 | Mg <sub>2</sub> PO <sub>4</sub> Cl                                                               | <i>Pna2<sub>1</sub></i>                         | <190                     | 0.046 @ 1064 nm <sup>b</sup>  | [3]       |
| 8                 | K <sub>2</sub> SrP <sub>4</sub> O <sub>12</sub>                                                  | $\bar{I}4$                                      | <200                     | 0.016 @ 1064 nm <sup>b</sup>  | [4]       |
| 9                 | LiRb <sub>2</sub> PO <sub>4</sub>                                                                | <i>Cmc2<sub>1</sub></i>                         | <170                     | 0.009 @ 1064 nm <sup>b</sup>  | [5]       |
| 10                | LiCs <sub>2</sub> PO <sub>4</sub>                                                                | <i>Cmc2<sub>1</sub></i>                         | 174                      | 0.010 @ 1064 nm <sup>b</sup>  | [6]       |
| 11                | KMg(H <sub>2</sub> O)PO <sub>4</sub>                                                             | <i>Pmn2<sub>1</sub></i>                         | <200                     | 0.017 @ 1064 nm <sup>b</sup>  | [7]       |
| 12                | KH <sub>2</sub> PO <sub>4</sub>                                                                  | $\bar{I}4_2d$                                   | 180                      | 0.035 @ 1064 nm <sup>a</sup>  | [8]       |
| 13                | NaBa <sub>2</sub> Al(P <sub>2</sub> O <sub>7</sub> ) <sub>2</sub>                                | <i>P1</i>                                       | <190                     | 0.007 @ 589 nm <sup>a</sup>   | [1]       |
| 14                | K <sub>4</sub> Mg <sub>4</sub> (P <sub>2</sub> O <sub>7</sub> ) <sub>3</sub>                     | <i>Pc</i>                                       | 170                      | 0.0108 @ 1064 nm <sup>a</sup> | [9]       |
| 15                | RbNaMgP <sub>2</sub> O <sub>7</sub>                                                              | <i>Pna2<sub>1</sub>/Cmc2<sub>1</sub></i>        | 185                      | 0.035 @ 1064 nm <sup>b</sup>  | [10]      |
| 16                | $\beta$ -Cd(PO <sub>3</sub> ) <sub>2</sub>                                                       | <i>P2<sub>1</sub>2<sub>1</sub>2<sub>1</sub></i> | <190                     | 0.059 @ 1064 nm <sup>b</sup>  | [11]      |
| 17                | La(PO <sub>3</sub> ) <sub>3</sub>                                                                | <i>C222<sub>1</sub></i>                         | <190                     | 0.040 @ 1064 nm <sup>b</sup>  | [11]      |
| 18                | CsLa(PO <sub>3</sub> ) <sub>4</sub>                                                              | <i>P2<sub>1</sub></i>                           | 167                      | 0.006 @ 1064 nm <sup>b</sup>  | [12]      |
| 19                | RbBa <sub>2</sub> (PO <sub>3</sub> ) <sub>5</sub>                                                | <i>Pc</i>                                       | 163                      | 0.009 @ 1064 nm <sup>b</sup>  | [13]      |
| 20                | KLa(PO <sub>3</sub> ) <sub>4</sub>                                                               | <i>P2<sub>1</sub></i>                           | 163                      | 0.0084 @ 1064 nm <sup>b</sup> | [14]      |
| 21                | Ba <sub>3</sub> P <sub>3</sub> O <sub>10</sub> Cl                                                | <i>Pca2<sub>1</sub></i>                         | 180                      | 0.028 @ 1064 nm <sup>b</sup>  | [15]      |
| 22                | Ba <sub>3</sub> P <sub>3</sub> O <sub>10</sub> Br                                                | <i>P2<sub>1</sub>2<sub>1</sub>2<sub>1</sub></i> | <200                     | 0.023 @ 1064 nm <sup>b</sup>  | [15]      |
| 23                | LiHgPO <sub>4</sub>                                                                              | <i>P4<sub>2</sub>/m</i>                         | <300                     | 0.0068 @ 1064 nm <sup>b</sup> | [16]      |
| 24                | K <sub>2</sub> TeP <sub>2</sub> O <sub>8</sub>                                                   | <i>P2<sub>1</sub>2<sub>1</sub>2<sub>1</sub></i> | 270                      | 0.05 @ 1064 nm <sup>b</sup>   | [18]      |
| 25                | CsMgPO <sub>4</sub> ·6H <sub>2</sub> O                                                           | <i>P6<sub>3</sub>/mmc</i>                       | 258                      | 0.006 @ 1064 nm <sup>b</sup>  | [18]      |
| 26                | RbMgPO <sub>4</sub> ·6H <sub>2</sub> O                                                           | <i>Pmn2<sub>1</sub></i>                         | 288                      | 0.005 @ 1064 nm <sup>b</sup>  | [18]      |
| <b>Sulfates</b>   |                                                                                                  |                                                 |                          |                               |           |
| 27                | Li <sub>8</sub> NaRb <sub>3</sub> (SO <sub>4</sub> ) <sub>6</sub> ·2H <sub>2</sub> O             | <i>C2</i>                                       | <190                     | 0.021 @ 1064 nm <sup>a</sup>  | [19]      |
| 28                | NH <sub>4</sub> NaLi <sub>2</sub> (SO <sub>4</sub> ) <sub>2</sub>                                | <i>C2</i>                                       | <186                     | 0.008 @ 1064 nm <sup>b</sup>  | [20]      |
| 29                | La(NH <sub>4</sub> )(SO <sub>4</sub> ) <sub>2</sub>                                              | <i>Pmn2<sub>1</sub></i>                         | <190                     | 0.03 @ 1064 nm <sup>b</sup>   | [21]      |
| 30                | LiKSO <sub>4</sub>                                                                               | <i>P6<sub>3</sub></i>                           | 160                      | 0.03 @ 1064 nm <sup>b</sup>   | [22]      |
| 31                | LiN <sub>2</sub> H <sub>5</sub> SO <sub>4</sub>                                                  | <i>Pna2<sub>1</sub></i>                         | <190                     | 0.0126 @ 1064 nm <sup>b</sup> | [23]      |
| 32                | K <sub>2</sub> Zn <sub>3</sub> (SO <sub>4</sub> )(HSO <sub>4</sub> ) <sub>2</sub> F <sub>4</sub> | <i>Cmc2<sub>1</sub></i>                         | <200                     | 0.01268 @ 546 nm <sup>a</sup> | [24]      |
| 33                | KZnSO <sub>4</sub> F                                                                             | <i>Pna2<sub>1</sub></i>                         | <190                     | 0.022 @ 550 nm <sup>b</sup>   | [25]      |
| 34                | KMgSO <sub>4</sub> F                                                                             | <i>Pna2<sub>1</sub></i>                         | 170                      | 0.012 @ 550 nm <sup>b</sup>   | [26]      |
| 35                | KSO <sub>3</sub> CF <sub>3</sub>                                                                 | <i>P2<sub>1</sub></i>                           | 156                      | 0.017 @ 1064 nm <sup>b</sup>  | [27]      |
| 36                | $\alpha$ -RbSO <sub>3</sub> CF <sub>3</sub>                                                      | <i>Cm</i>                                       | <200                     | 0.035 @ 1064 nm <sup>b</sup>  | [28]      |

|                   |                                                                                                 |                                                 |      |                               |      |
|-------------------|-------------------------------------------------------------------------------------------------|-------------------------------------------------|------|-------------------------------|------|
| 37                | $\beta$ -RbSO <sub>3</sub> CF <sub>3</sub>                                                      | <i>P2<sub>1</sub></i>                           | <200 | 0.034 @ 1064 nm <sup>b</sup>  | [28] |
| 38                | CsSO <sub>3</sub> CF <sub>3</sub>                                                               | <i>P2<sub>1</sub></i>                           | <200 | 0.027 @ 1064 nm <sup>b</sup>  | [29] |
| 39                | KYSO <sub>4</sub> F <sub>2</sub>                                                                | <i>P2<sub>1</sub>/m</i>                         | <190 | 0.015 @ 546.1 nm <sup>a</sup> | [30] |
| 40                | RbYSO <sub>4</sub> F <sub>2</sub>                                                               | <i>P2<sub>1</sub>/m</i>                         | <190 | 0.02 @ 546.1 nm <sup>a</sup>  | [30] |
| 41                | (NH <sub>4</sub> ) <sub>2</sub> BeS <sub>2</sub> O <sub>8</sub>                                 | $\bar{I}A2d$                                    | <200 | 0.019 @ 546.1 nm <sup>a</sup> | [31] |
| 42                | K <sub>2</sub> BeS <sub>2</sub> O <sub>8</sub>                                                  | $\bar{I}A2d$                                    | <200 | 0.024 @ 546.1 nm <sup>a</sup> | [31] |
| 43                | Rb <sub>2</sub> BeS <sub>2</sub> O <sub>8</sub>                                                 | $\bar{I}A2d$                                    | <200 | 0.024 @ 546.1 nm <sup>a</sup> | [31] |
| 44                | Cs <sub>2</sub> BeS <sub>2</sub> O <sub>8</sub>                                                 | $\bar{I}A2d$                                    | <200 | 0.013 @ 546.1 nm <sup>a</sup> | [31] |
| 45                | Li <sub>2</sub> SO <sub>4</sub> ·H <sub>2</sub> O                                               | <i>P2<sub>1</sub></i>                           | 240  | 0.023 @ 1064 nm <sup>b</sup>  | [32] |
| 46                | K <sub>2</sub> Bi <sub>2</sub> (SO <sub>4</sub> ) <sub>2</sub> Cl <sub>4</sub>                  | <i>P2<sub>1</sub>2<sub>1</sub>2<sub>1</sub></i> | 278  | 0.056 @ 1064 nm <sup>b</sup>  | [33] |
| 47                | (NH <sub>4</sub> ) <sub>2</sub> Bi <sub>2</sub> (SO <sub>4</sub> ) <sub>2</sub> Cl <sub>4</sub> | <i>P2<sub>1</sub>2<sub>1</sub>2<sub>1</sub></i> | 273  | 0.055 @ 1064 nm <sup>b</sup>  | [33] |
| 48                | Rb <sub>2</sub> Bi <sub>2</sub> (SO <sub>4</sub> ) <sub>2</sub> Cl <sub>4</sub>                 | <i>P2<sub>1</sub>2<sub>1</sub>2<sub>1</sub></i> | 276  | 0.047 @ 1064 nm <sup>b</sup>  | [33] |
| 49                | Rb <sub>3</sub> In(SO <sub>4</sub> ) <sub>3</sub>                                               | <i>R3c</i>                                      | 215  | 0.019 @ 1064 nm <sup>b</sup>  | [34] |
| 50                | Sb <sub>6</sub> O <sub>7</sub> (SO <sub>4</sub> ) <sub>2</sub>                                  | <i>Ccc2</i>                                     | 286  | 0.052 @ 1064 nm <sup>b</sup>  | [35] |
| 51                | CsY(SO <sub>4</sub> ) <sub>2</sub> ·4H <sub>2</sub> O                                           | <i>P2<sub>1</sub>/c</i>                         | 200  | 0.045 @ 546 nm <sup>b</sup>   | [36] |
| 52                | NaRbY <sub>2</sub> (SO <sub>4</sub> ) <sub>4</sub>                                              | <i>C2/c</i>                                     | 200  | 0.045 @ 550 nm <sup>a</sup>   | [37] |
| 53                | NaBi(SO <sub>4</sub> ) <sub>2</sub> ·H <sub>2</sub> O                                           | <i>P3<sub>2</sub>2<sub>1</sub></i>              | 280  | 0.068 @ 546 nm <sup>a</sup>   | [38] |
| 54                | ZrF <sub>2</sub> (SO <sub>4</sub> )                                                             | <i>Pca2<sub>1</sub></i>                         | 206  | 0.052 @ 1064 nm <sup>a</sup>  | [39] |
| 55                | (NH <sub>4</sub> ) <sub>2</sub> S <sub>2</sub> O <sub>3</sub>                                   | <i>C2</i>                                       | 238  | 0.077 @ 546 nm <sup>a</sup>   | [40] |
| <b>Sulfamates</b> |                                                                                                 |                                                 |      |                               |      |
| 56                | Pb(NH <sub>2</sub> SO <sub>3</sub> ) <sub>2</sub> ·H <sub>2</sub> O                             | <i>P2<sub>1</sub>/c</i>                         | 226  | 0.032 @ 1064 nm <sup>b</sup>  | [41] |
| 57                | Pb(NH <sub>2</sub> SO <sub>3</sub> ) <sub>2</sub>                                               | <i>P2<sub>1</sub>/c</i>                         | 208  | 0.023 @ 1064 nm <sup>b</sup>  | [41] |
| 58                | Ca(NH <sub>2</sub> SO <sub>3</sub> ) <sub>2</sub> ·4H <sub>2</sub> O                            | <i>C2/c</i>                                     | <200 | 0.025 @ 1064 nm <sup>b</sup>  | [41] |
| 59                | Ca(NH <sub>2</sub> SO <sub>3</sub> ) <sub>2</sub> ·H <sub>2</sub> O                             | <i>P2<sub>1</sub>2<sub>1</sub>2<sub>1</sub></i> | <200 | 0.033 @ 1064 nm <sup>b</sup>  | [41] |
| 60                | Cs <sub>2</sub> Mg(NH <sub>2</sub> SO <sub>3</sub> ) <sub>4</sub> ·4H <sub>2</sub> O            | <i>Cm</i>                                       | <180 | 0.054 @ 546.1 nm <sup>a</sup> | [42] |
| 61                | K <sub>2</sub> Ca(NH <sub>2</sub> SO <sub>3</sub> ) <sub>4</sub>                                | $P\bar{1}$                                      | <200 | 0.035 @ 523 nm <sup>b</sup>   | [42] |
| 62                | Rb <sub>2</sub> Ca(NH <sub>2</sub> SO <sub>3</sub> ) <sub>4</sub>                               | $P\bar{1}$                                      | <200 | 0.036 @ 523 nm <sup>b</sup>   | [42] |
| 63                | Cd(NH <sub>2</sub> SO <sub>3</sub> ) <sub>2</sub> ·2H <sub>2</sub> O                            | $P\bar{1}$                                      | 212  | 0.052 @ 1064 nm <sup>b</sup>  | [43] |
| 64                | Cd(NH <sub>2</sub> SO <sub>3</sub> ) <sub>2</sub>                                               | <i>P2<sub>1</sub>2<sub>1</sub>2<sub>1</sub></i> | 210  | 0.037 @ 1064 nm <sup>b</sup>  | [43] |
| 65                | Ba(SO <sub>3</sub> NH <sub>2</sub> ) <sub>2</sub>                                               | <i>Pna2<sub>1</sub></i>                         | <190 | 0.028 @ 546.1 nm <sup>a</sup> | [44] |
| 66                | Sr(SO <sub>3</sub> NH <sub>2</sub> ) <sub>2</sub>                                               | <i>Pc</i>                                       | <190 | 0.056 @ 589.3 nm <sup>a</sup> | [44] |
| <b>Others</b>     |                                                                                                 |                                                 |      |                               |      |
| 67                | NH <sub>3</sub> BH <sub>3</sub>                                                                 | <i>I4mm</i>                                     | <190 | 0.056 @ 550 nm <sup>a</sup>   | [45] |
| 68                | KN(SO <sub>2</sub> F) <sub>2</sub>                                                              | <i>Pbca</i>                                     | 182  | 0.061 @ 546 nm <sup>b</sup>   | [46] |
| 69                | (NH <sub>4</sub> ) <sub>2</sub> PO <sub>3</sub> F                                               | <i>Pna2<sub>1</sub></i>                         | 176  | 0.035 @ 532 nm <sup>b</sup>   | [47] |
| 70                | NaNH <sub>4</sub> PO <sub>3</sub> F·H <sub>2</sub> O                                            | <i>Pn</i>                                       | 176  | 0.053 @ 532 nm <sup>b</sup>   | [48] |
| 71                | Na <sub>2</sub> PO <sub>3</sub> F                                                               | <i>P2<sub>1</sub>2<sub>1</sub>2<sub>1</sub></i> | <190 | 0.036 @ 532 nm <sup>b</sup>   | [49] |
| 72                | KHPO <sub>3</sub> F                                                                             | <i>P2<sub>1</sub></i>                           | <190 | 0.028 @ 532 nm <sup>b</sup>   | [50] |
| 73                | NaPO <sub>3</sub> NH <sub>3</sub>                                                               | <i>P6<sub>3</sub></i>                           | <190 | 0.062 @ 546.1 nm <sup>a</sup> | [51] |
| 74                | Ba(SO <sub>3</sub> CH <sub>3</sub> ) <sub>2</sub>                                               | <i>Cmc2<sub>1</sub></i>                         | 159  | 0.04 @ 589.3 nm <sup>a</sup>  | [52] |
| 75                | Na <sub>2</sub> S <sub>3</sub> O <sub>6</sub>                                                   | <i>Fdd2</i>                                     | 212  | 0.056 @ 546 nm <sup>a</sup>   | [53] |
| 76                | K <sub>2</sub> S <sub>4</sub> O <sub>6</sub>                                                    | <i>Cc</i>                                       | 298  | 0.066 @ 1064 nm <sup>b</sup>  | [54] |

<sup>a</sup>Measured birefringence, <sup>b</sup>calculated birefringence.

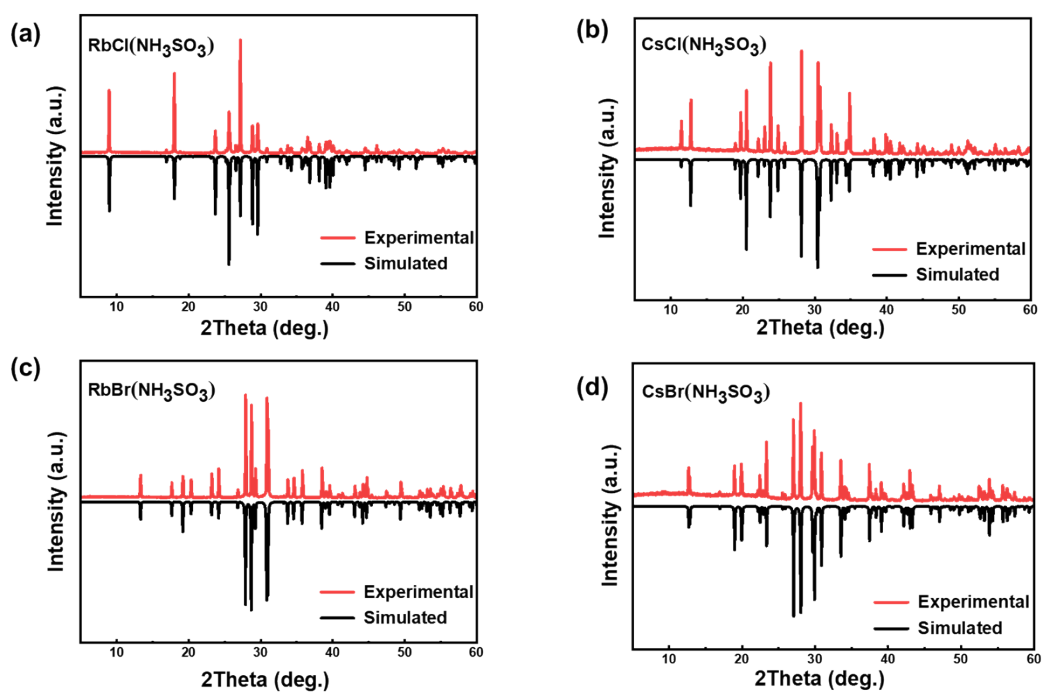

**Figure S1.** Experimental and simulated PXRD patterns for MX(NH<sub>3</sub>SO<sub>3</sub>) (M = Rb, Cs; X = Cl, Br).

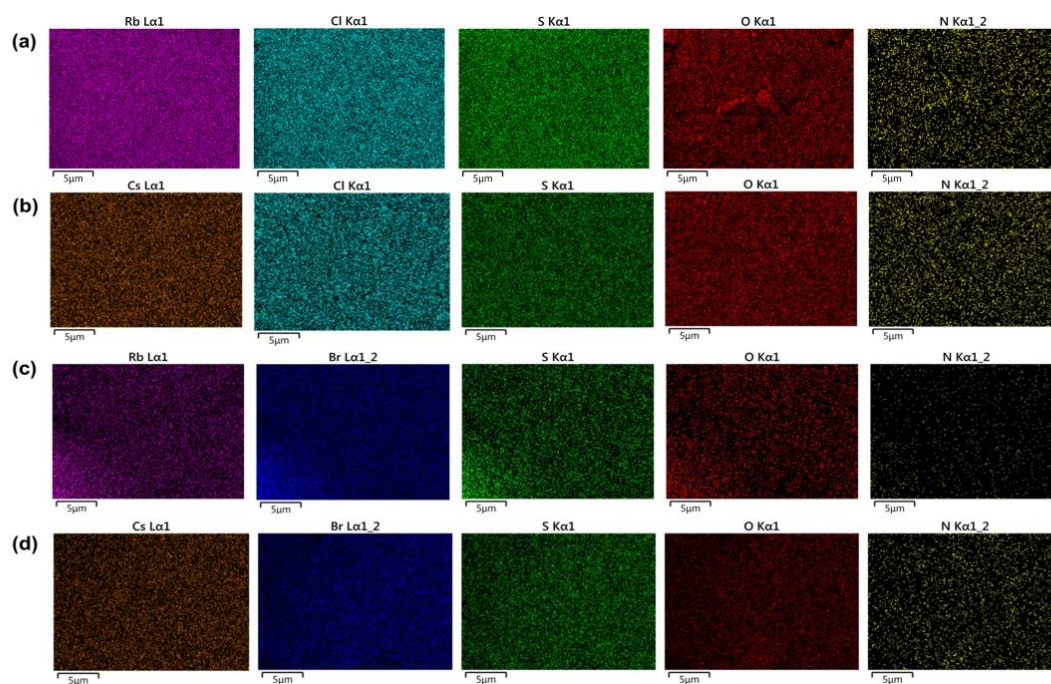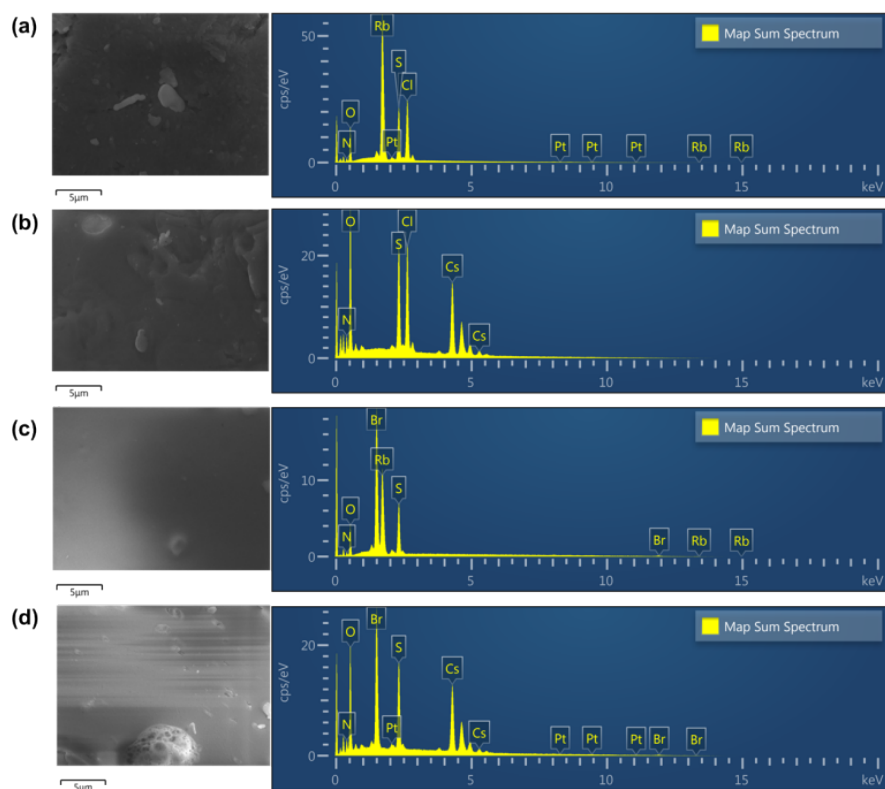

**Figure S2.** SEM-EDX for MX(NH<sub>3</sub>SO<sub>3</sub>) (M = Rb, Cs; X = Cl, Br).

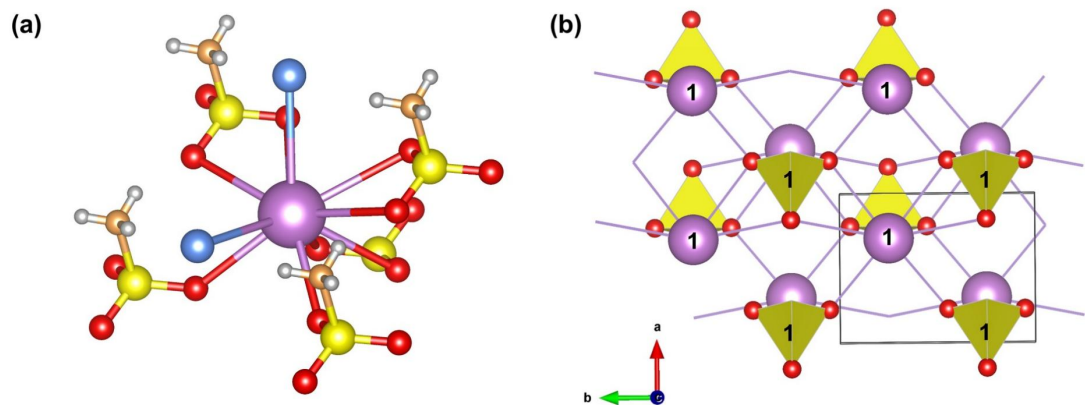

**Figure S3.** (a) The asymmetric unit and (b) pseudo-doubled layer along the  $ab$  planes for  $\text{RbCl}(\text{NH}_3\text{SO}_3)$ .

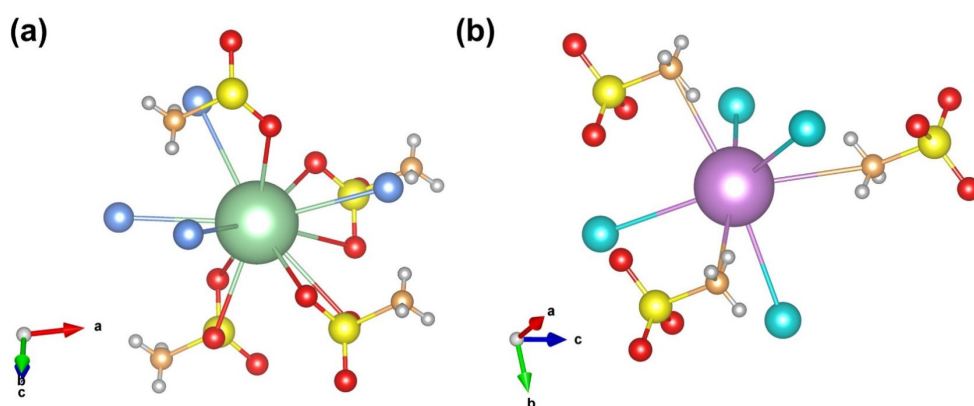

**Figure S4.** (a) The asymmetric unit for  $\text{CsCl}(\text{NH}_3\text{SO}_3)$  and (b) the asymmetric unit for  $\text{RbBr}(\text{NH}_3\text{SO}_3)$ .

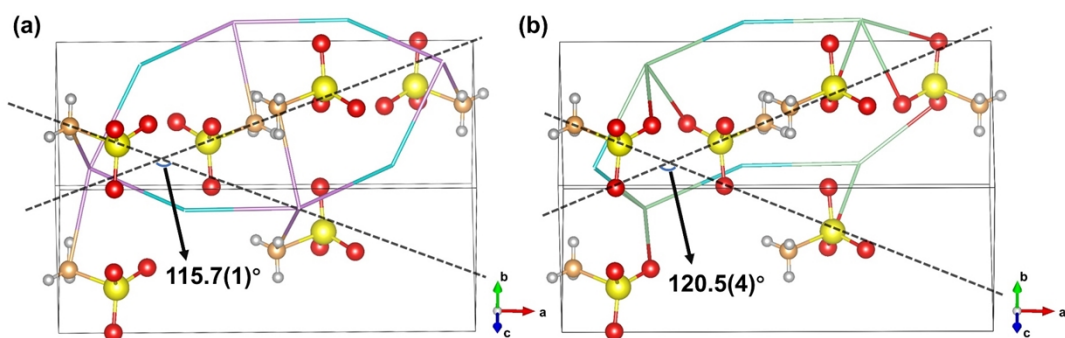

**Figure S5.** The intersection angle of the  $\text{NH}_3\text{SO}_3$  tetrahedra in (a)  $\text{RbBr}(\text{NH}_3\text{SO}_3)$  and (b)  $\text{CsBr}(\text{NH}_3\text{SO}_3)$ .

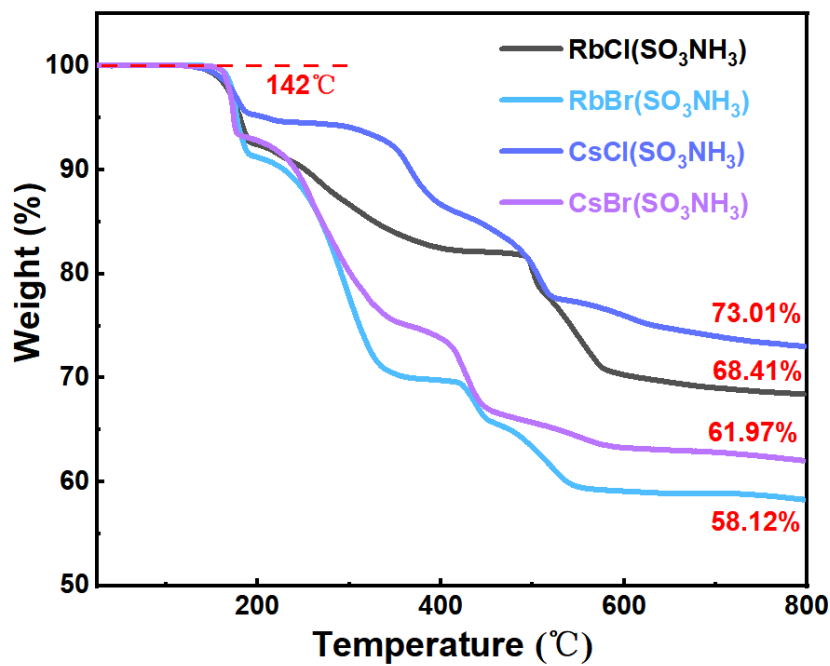

Figure S6. TGA diagrams for MX(NH<sub>3</sub>SO<sub>3</sub>) (M = Rb, Cs; X = Cl, Br).

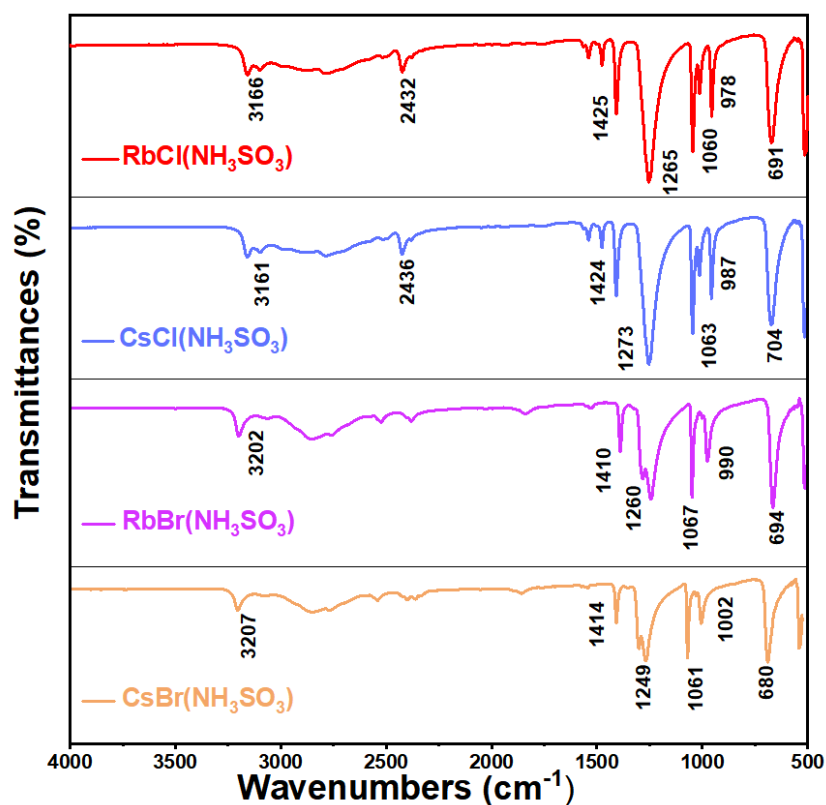

Figure S7. IR spectra for MX(NH<sub>3</sub>SO<sub>3</sub>) (M = Rb, Cs; X = Cl, Br).

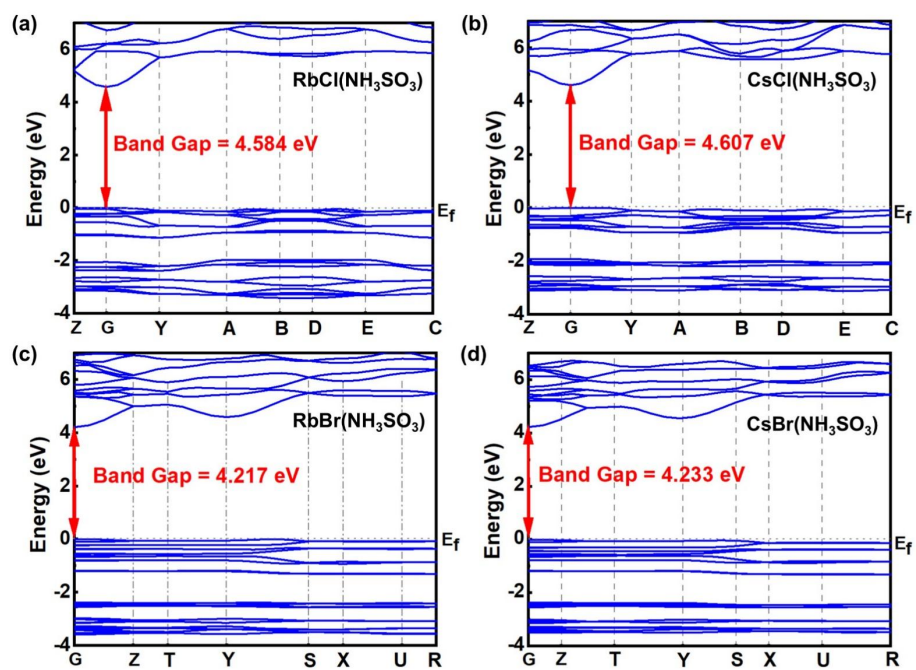

**Figure S8.** Band structures of compounds for MX(NH<sub>3</sub>SO<sub>3</sub>) (M = Rb, Cs; X = Cl, Br).



## References

- 1 F. Wang, X.-N. Yao, Y. Guo, L. Yang, Y.-G. Chen and X.-M. Zhang, Insights into Varying Dimension Structures for Deep-UV Optical Crystals  $\text{NaBa}_2\text{Al}(\text{P}_2\text{O}_7)_2$  and  $\text{NaBaAl}(\text{PO}_4)_2$  Constructed Separately from Unique  $[\text{Al}(\text{P}_2\text{O}_7)_2]$  Chains and  $[\text{Al}(\text{PO}_4)_2]$  Layers, *J. Solid. State. Chem.*, 2021, **301**, 8.
- 2 Y.-G. Chen, X. Yu, Y. Guo, Y. Xue, X. H. Hao, X. Yao and X.-M. Zhang, Ca-cluster-constructed Deep-Ultraviolet Nonlinear-optical Crystal  $\text{Na}_2\text{Ca}_{17}\text{Al}_2(\text{PO}_4)_{14}$  with Strong NLO Response, *J. Alloy. Compd.*, 2022, **896**, 6.
- 3 J.-X. Zhang, Q.-G. Yue, S.-H. Zhou, X.-T. Wu, H. Lin and Q.-L. Zhu, Screening Strategy Identifies an Overlooked Deep-Ultraviolet Transparent Nonlinear Optical Crystal, *Angew. Chem. Int. Ed.*, 2024, **63**, 7.
- 4 Z. Bai, L. Liu, L. Zhang, Y. Huang, F. Yuan and Z. Lin,  $\text{K}_2\text{SrP}_4\text{O}_{12}$ : a deep-UV Transparent Cyclophosphate as a Nonlinear Optical Crystal, *Chem. Commun.*, 2019, **55**, 8454–8457.
- 5 L. Li, Y. Wang, B.-H. Lei, S. Han, Z. Yang, H. Li and S. Pan,  $\text{LiRb}_2\text{PO}_4$ : a New Deep-ultraviolet Nonlinear Optical Phosphate with a Large SHG Response, *J. Mater. Chem. C*, 2017, **5**, 269–274.
- 6 X. Cheng, M.-H. Whangbo, G.-C. Guo, M. Hong and S. Deng, Large Second-Harmonic Generation of  $\text{LiCs}_2\text{PO}_4$  is caused by the Metal-Cation-Centered Groups, *Angew. Chem. Int. Ed.*, 2018, **57**, 3933–3937.
- 7 Z. Bai, C.-L. Hu, L. Liu, L. Zhang, Y. Huang, F. Yuan and Z. Lin,  $\text{KMg}(\text{H}_2\text{O})\text{PO}_4$ : A Deep-Ultraviolet Transparent Nonlinear Optical Material Derived from  $\text{KTiO}_p\text{O}_4$ , *Chem. Mat.*, 2019, **31**, 9540–9545.
- 8 J. De Yoreo, A. Burnham and P. Whitman, Developing  $\text{KH}_2\text{PO}_4$  and  $\text{KD}_2\text{PO}_4$  Crystals for The World's Most Power Laser, *Inter. Mater. Rev.*, 2002, **47**, 113–152.
- 9 H. Yu, J. Young, H. Wu, W. Zhang, J. M. Rondinelli and P. S. Halasyamani,  $\text{M}_4\text{Mg}_4(\text{P}_2\text{O}_7)_3$  (M = K, Rb): Structural Engineering of Pyrophosphates for Nonlinear Optical Applications, *Chem. Mat.*, 2017, **29**, 1845–1855.
- 10 X. Yang, S. Zhao, S. Geng, L. Yang, Q. Huang, X. Kuang, J. Luo and X. Xing, Structural Origin of Thermally Induced Second Harmonic Generation Enhancement in  $\text{RbNaMgP}_2\text{O}_7$ , *Chem. Mat.*, 2019, **31**, 9843–9849.
- 11 J. Lv, Y. Qun, Q. Jing, X. Wang, M.-H. Lee and Z. Chen, Two Metal Phosphate Nonlinear Optical Materials Simultaneously Exhibiting Ultraviolet Transparency and a Large Birefringence, *Chem. Mat.*, 2022, 9.
- 12 T. Sun, P. Shan, H. Chen, X. Liu, H. Liu, S. Chen, Y. Cao, Y. Kong and J. Xu, Growth and Properties of a Noncentrosymmetric Polyphosphate  $\text{CsLa}(\text{PO}_3)_4$  Crystal with Deep-ultraviolet Transparency, *Crystengcomm*, 2014, **16**, 10497–10504.
- 13 S. Zhao, P. Gong, S. Luo, L. Bai, Z. Lin, C. Ji, T. Chen, M. Hong and J. Luo, Deep-Ultraviolet Transparent Phosphates  $\text{RbBa}_2(\text{PO}_3)_5$  and  $\text{Rb}_2\text{Ba}_3(\text{P}_2\text{O}_7)_2$  Show Nonlinear Optical Activity from Condensation of  $[\text{PO}_4]^{3-}$  Units, *J. Am. Chem. Soc.*, 2014, **136**, 8560–8563.
- 14 P. Shan, T. Sun, H. Chen, H. Liu, S. Chen, X. Liu, Y. Kong and J. Xu, Crystal Growth and Optical Characteristics of Beryllium-free Polyphosphate,  $\text{KLa}(\text{PO}_3)_4$ , a Possible Deep-ultraviolet Nonlinear Optical Crystal, *Sci. Rep.*, 2016, **6**, 25201.
- 15 P. Yu, L.-M. Wu, L.-J. Zhou and L. Chen, Deep-ultraviolet nonlinear optical crystals:  $\text{Ba}_3\text{P}_3\text{O}_{10}\text{X}$  (X= Cl, Br), *J. Am. Chem. Soc.*, 2014, **136**, 480–487.
- 16 B.-L. Wu, C.-L. Hu, F.-F. Mao, R.-L. Tang and J.-G. Mao, Highly Polarizable  $\text{Hg}^{2+}$  Induced a Strong Second Harmonic Generation Signal and Large Birefringence in  $\text{LiHgPO}_4$ , *J. Am. Chem. Soc.*, 2019, **141**, 10188–10192.

- 17 M. Wen, C. Hu, Z. Yang, X. Wu and S. Pan,  $K_2TeP_2O_8$ : a New Telluro-phosphate with a Pentagonal Te-P-O Layer Structure, *Dalton Trans.*, 2018, **47**, 9453–9458.
- 18 Y. Zhou, L. Cao, C. Lin, M. Luo, T. Yan, N. Ye and W. Cheng,  $AMgPO_4 \cdot 6H_2O$  (A= Rb, Cs): Strong SHG Responses Originated from Orderly  $PO_4$  Groups, *J. Mater. Chem. C*, 2016, **4**, 9219–9226.
- 19 Y. Li, S. Zhao, P. Shan, X. Li, Q. Ding, S. Liu, Z. Wu, S. Wang, L. Li and J. Luo,  $Li_8NaRb_3(SO_4)_6 \cdot 2H_2O$  as a New Sulfate Deep-ultraviolet Nonlinear Optical Material, *J. Mater. Chem. C*, 2018, **6**, 12240–12244.
- 20 Y. Li, F. Liang, S. Zhao, L. Li, Z. Wu, Q. Ding, S. Liu, Z. Lin, M. Hong and J. Luo, Two Non- $\pi$ -conjugated Deep-UV Nonlinear Optical Sulfates, *J. Am. Chem. Soc.*, 2019, **141**, 3833–3837.
- 21 C. Wu, X. Jiang, Y. Hu, C. Jiang, T. Wu, Z. Lin, Z. Huang, M. G. Humphrey and C. Zhang, A Lanthanum Ammonium Sulfate Double Salt with a Strong SHG Response and Wide Deep-UV Transparency, *Angew. Chem. Int. Ed.*, 2022, **61**, e202115855.
- 22 C. Amirthakumar, B. Valarmathi, P. Pandi and R. M. Kumar, Investigation on Inorganic Potassium Lithium Sulfate Single Crystal Grown by SR Method and Its Characterization for Nonlinear Optical Application, *Chin. J. Phys.*, 2020, **67**, 305–313.
- 23 T. F. T. Fukami and R.-H. C. R.-H. Chen, Crystal Structure and Electrical Conductivity of  $LiN_2H_5SO_4$  at High Temperature, *Jpn. J. Appl. Phys.*, 1998, **37**, 925.
- 24 Y. Zhou, X. Zhang, Z. Xiong, X. Long, Y. Li, Y. Chen, X. Chen, S. Zhao, Z. Lin and J. Luo, Non- $\pi$ -Conjugated Deep-ultraviolet Nonlinear Optical Crystal  $K_2Zn_3(SO_4)(HSO_4)_2F_4$ , *J. Phys. Chem. Lett.*, 2021, **12**, 8280–8284.
- 25 Y. Zhou, X. Liu, Z. Lin, Y. Li, Q. Ding, Y. Liu, Y. Chen, S. Zhao, M. Hong and J. Luo, Pushing  $KTiOPO_4$ -like Nonlinear Optical Sulfates into the Deep-Ultraviolet Spectral Region, *Inorg. Chem.*, 2021, **60**, 18950–18956.
- 26 A. Poddar, S. Gedam and S. Dhoble, Development of Orange-red Emitting Phosphors and Studies of Thermoluminescence Characteristics of  $KMgSO_4F$  Material, *J. Lumin.*, 2014, **149**, 245–250.
- 27 S. Ko, Y. Yamada and A. Yamada, A 62 m K-ion Aqueous Electrolyte, *Electrochem. Commun.*, 2020, **116**, 106764.
- 28 L. Hildebrandt, R. Dinnebier and M. Jansen, Crystal Structure and Ionic Conductivity of Three Polymorphic Phases of Rubidium Trifluoromethyl Sulfonate,  $RbSO_3CF_3$ , *Inorg. Chem.*, 2006, **45**, 3217–3223.
- 29 B. Xu, P. Gong, F. Liu, X. Zhang, H. Huo and Z. Lin,  $(SO_3CF_3)^-$ : A Non- $\pi$ -Conjugated Motif for Nonlinear Optical Crystals Transparent into the Deep-Ultraviolet Region, *Adv. Opt. Mater.*, 2024, **12**, 2301725.
- 30 Z. Wu, H. Li, X. Hou, Z. Yang and H. Shi,  $AYSO_4F_2$  (A= K, Rb):  $[YO_4F_4]$  Polyhedra Enhancement of Birefringence in Non- $\pi$ -Conjugated Sulfate Systems, *Inorg. Chem.*, 2024, **63**, 4783–4789.
- 31 Y. Sun, C. Lin, H. Tian, Y. Zhou, J. Chen, S. Yang, N. Ye and M. Luo,  $A_2BeS_2O_8$  (A =  $NH_4$ , K, Rb, Cs) Deep Ultraviolet Nonlinear Optical Crystals, *Chem. Mat.*, 2022, **34**, 3781–3788.
- 32 P. Becker, S. Ahrweiler, P. Held, H. Schneeberger and L. Bohatý, Thermal expansion, Pyroelectricity and Linear Optical Properties of  $Li_2SeO_4 \cdot H_2O$  and  $Li_2SO_4 \cdot H_2O$ , *Cryst. Res. Technol.*, 2003, **38**, 881–889.
- 33 K. Chen, Y. Yang, G. Peng, S. Yang, T. Yan, H. Fan, Z. Lin and N. Ye,  $A_2Bi_2(SO_4)_2Cl_4$  (A= $NH_4$ , K, Rb): Achieving a Subtle Balance of the Large Second Harmonic Generation Effect and Sufficient Birefringence in Sulfate Nonlinear Optical Materials, *J. Mater. Chem. C*, 2019, **7**, 9900–9907.
- 34 Q. Xu, X. Jiang, C. Wu, L. Lin, Z. Huang, Z. Lin, M. G. Humphrey and C. Zhang,  $Rb_3In(SO_4)_3$ : a

- Defluorinated Mixed Main-group Metal Sulfate for Ultraviolet Transparent Nonlinear Optical Materials with a Large Optical Band Gap, *J. Mater. Chem. C*, 2021, **9**, 5124–5131.
- 35 Q. Wei, C. He, K. Wang, X.-F. Duan, X.-T. An, J.-H. Li and G.-M. Wang,  $\text{Sb}_6\text{O}_7(\text{SO}_4)_2$ : A Promising Ultraviolet Nonlinear Optical Material with an Enhanced Second-Harmonic-Generation Response Activated by SbIII Lone-Pair Stereo Activity, *Chem. Eur. J.*, 2021, **27**, 5880–5884.
- 36 Y. Shen, L. Huang, Z. Wang, Y. Zhou, X. Xue, H. Lin, R. Yan, S. Zhao and J. Luo,  $\text{CsY}(\text{SO}_4)_2 \cdot 4\text{H}_2\text{O}$ : a Deep-Ultraviolet Birefringent Crystal induced by an Edge-sharing Connection, *Inorg. Chem.*, 2022, **61**, 4468–4475.
- 37 Y. Zhao, Y. Song, Y. Li, W. Liu, Y. Zhou, W. Huang, J. Luo, S. Zhao and B. Ahmed, Deep-Ultraviolet Bialkali-Rare Earth Metal Anhydrous Sulfate Birefringent Crystal, *Inorg. Chem.*, 2024.
- 38 S. Cheng, Y. Wu, D. Mei, S. Wen and T. Doert, Synthesis, Crystal Structures, Spectroscopic Characterization, and Thermal Analyses of the New Bismuth Sulfates  $\text{NaBi}(\text{SO}_4)_2 \cdot \text{H}_2\text{O}$  and  $\text{ABi}(\text{SO}_4)_2$  (A= K, Rb, Cs), *Z. Anorg. Allg. Chem.*, 2020, **646**, 1688–1695.
- 39 C. Wu, C. Jiang, G. Wei, X. Jiang, Z. Wang, Z. Lin, Z. Huang, M. G. Humphrey and C. Zhang, Toward Large Second-harmonic Generation and Deep-UV Transparency in Strongly Electropositive Transition Metal Sulfates, *J. Am. Chem. Soc.*, 2023, **145**, 3040–3046.
- 40 S. Ke, H. Fan, C. Lin, N. Ye and M. Luo, Constructing Ultraviolet Nonlinear Optical Crystals with Large Second Harmonic Generation and Short Absorption Edges by using Polar Tetrahedral  $\text{S}_2\text{O}_3$  Groups, *Inorg. Chem. Front.*, 2023, **10**, 2811–2817.
- 41 D. Dou, B. Cai, B. Zhang and Y. Wang,  $\text{M}(\text{NH}_2\text{SO}_3)_2 \cdot x\text{H}_2\text{O}$  (M= Ca, Pb, x= 0, 1, 4): Effect of Hydrogen Bonding on Structural Transformations and Second Harmonic Generation of Metal Sulfamates, *Inorg. Chem.*, 2022, **61**, 21131–21138.
- 42 X. Wang, X. Leng, Y. Kuk, J. Lee, Q. Jing and K. M. Ok, Deep-Ultraviolet Transparent Mixed Metal Sulfamates with Enhanced Nonlinear Optical Properties and Birefringence, *Angew. Chem. Int. Ed.*, 2024, **63**, e202315434.
- 43 X. Wang, J. Lee, Y. Li, Y. Kuk and K. M. Ok,  $\text{Cd}(\text{NH}_2\text{SO}_3)_2 \cdot x\text{H}_2\text{O}$  (x= 0, 2): New Sulfamates with a Unique Coordination Environment and Reversible Phase Transitions, *Inorg. Chem. Front.*, 2023, **10**, 1411–1420.
- 44 H. Fan, N. Ye and M. Luo, New Functional Groups Design toward High Performance Ultraviolet Nonlinear Optical Materials, *Acc. Chem. Res.*, 2023, **56**, 3099–3109.
- 45 Y. Zhou, N. He, Z. Lin, X. Shang, X. Chen, Y. Li, W. Huang, M. Hong, S. Zhao and J. Luo, A Non- $\pi$ -Conjugated Molecular Crystal with Balanced Second-Harmonic Generation, Bandgap, and Birefringence, *Small*, 2024, **20**, 2305473.
- 46 K. Matsumoto, T. Oka, T. Nohira and R. Hagiwara, Polymorphism of Alkali Bis (fluorosulfonyl) Amides ( $\text{M}[\text{N}(\text{SO}_2\text{F})_2]$ , M= Na, K, and Cs), *Inorg. Chem.*, 2013, **52**, 568–576.
- 47 L. Xiong, J. Chen, J. Lu, C.-Y. Pan and L.-M. Wu, Monofluorophosphates: a New Source of Deep-ultraviolet Nonlinear Optical Materials, *Chem. Mat.*, 2018, **30**, 7823–7830.
- 48 Q. Ding, X. Zhang, Z. Lin, Z. Xiong, Y. Wang, X. Long, S. Zhao, M. Hong and J. Luo, Designing a Deep-UV Nonlinear Optical Monofluorophosphate, *Sci. China Chem.*, 2022, **65**, 1710–1714.
- 49 W. Jin, C. Xie, X. Hou, M. Cheng, E. Tikhonov, M. Wu, S. Pan and Z. Yang, From Monofluorophosphates  $\text{A}_2\text{PO}_3\text{F}$  to Difluorophosphates  $\text{APO}_2\text{F}_2$  (A= alkali metal): Design of a Potential Deep-ultraviolet Nonlinear Optical Materials System with a Shortened Phase-matching Wavelength, *Chem. Mat.*, 2023, **35**, 5281–5290.
- 50 H. A. Prescott, S. I. Troyanov and E. Kemnitz, The Crystal Structures of the Potassium Hydrogen

- Monofluorophosphates,  $\text{KHPO}_3\text{F}$  and  $\text{K}_3[\text{H}(\text{PO}_3\text{F})_2]$ , and the  $\alpha$  Modification of  $\text{RbHPO}_3\text{F}$ , *Z. Kristallogr. Cryst. Mater.*, 2003, **218**, 604–611.
- 51 L. Wu, H. Tian, C. Lin, X. Zhao, H. Fan, P. Dong, S. Yang, N. Ye and M. Luo, Optimized Arrangement of Non- $\pi$ -conjugated  $\text{PO}_3\text{NH}_3$  Units Leads to Enhanced Ultraviolet Optical Nonlinearity in  $\text{NaPO}_3\text{NH}_3$ , *Inorg. Chem. Front.*, 2024, **11**, 1145–1152.
- 52 H. Tian, C. Lin, X. Zhao, F. Xu, C. Wang, N. Ye and M. Luo,  $\text{Ba}(\text{SO}_3\text{CH}_3)_2$ : A Deep-Ultraviolet Transparent Crystal with Excellent Optical Nonlinearity Based on a New Polar Non- $\pi$ -Conjugated NLO Building Unit  $\text{SO}_3\text{CH}_3^-$ , *CCS Chem.*, 2023, **5**, 2497–2505.
- 53 H. Sha, Y. Shang, Z. Wang, R. Su, C. He, X. Yang and X. Long, A Sharp Improvement of Sulfate's Birefringence Induced by the Synergistic Effect of Heteroleptic and Dimeric Strategies, *Small*, 2024, **20**, 2309776.
- 54 T. Huang, Y. Xiao, J. Gu, Y. Wang, K. Wu and B. Zhang,  $\text{K}_2\text{S}_4\text{O}_6$ : Improving Birefringence and Nonlinear Optical Properties with the  $[\text{O}_3\text{S-S-S-SO}_3]^{2-}$  Group, *J. Mater. Chem. C*, 2022, **10**, 17190–17195.
